# Supplementary material for: Maternal nutrition intervention and maternal complications in 4 districts of Bangladesh: A nested cross-sectional study
Source: PubMed Central journal article supplement (PMC6777761; doi:10.1371/journal.pmed.1002927), 2019-10-04
Supplement: pmed.1002927.s007.pdf [file pmed.1002927.s007.pdf]

**SK DATA ABSTRACTION FORM**  
(এসকে ডাটা এবসটাকশন ফরম)

Instructions: Please review the SK register, the patient red booklet, and (if delivered or referred to a hospital) the hospital certificate/record with the SK after the postnatal care visit or at the SK's home/BRAC office. If the record is reviewed while accompanied by the SK at the participant's home, please do so outside of the patient's home or in a private way during the visit while the SK engages the patient and her family. Record the information as noted in these sources. For missing data, please mark the data as missing – do not ask the SK or participant to try to recall the information. For data that seem contradictory to what the participant reported during the interview, ask the SK to clarify with the participant and if any change is needed for the written record, it must be done by the SK.

ছমিকা:- স্বাস্থ্য কর্মীর রেজিস্টার পুনরায় রিভিউ/যাচাই করুন। রোগীর লাল বুকলেট(যদি হাসপাতালে রেফার্ড করে) হাসপাতালের সার্টিফিকেট/তথ্য সহ স্বাস্থ্য কর্মীর পূর্বের পি এন সি ভিজিট যাচাই করুন। ভিজিট করার সময় রোগীর বাড়ীর প্রতিবেশী অথবা গোপনীয়ভাবে স্বাস্থ্যকর্মী,রোগী এবং রোগীর পরিবারের সাথে জড়িত আছে কিনা যাচাই করুন। কোথা থেকে এই তথ্য পেয়েছেন তা রেকর্ড রাখা। বাদ পড়া তথ্যের জন্য; বাদ পড়া তথ্য দাগ দিয়ে রাখা। তথ্য সংগ্রহের জন্য স্বাস্থ্যকর্মী বা রোগীকে প্রশ্ন না করা।

For maternal deaths, please complete this form based on the SK register and verbal autopsy report.

মাতৃ মৃত্যুর জন্য, স্বাস্থ্যকর্মীর রেজিস্টার এবং ভারভাল অটোপসী রিপোর্ট অনুযায়ী ফরম পূরন করুন।

| No. | Question                                             | Response Options                                                                                               | Response   | Skip/Notes |
|-----|------------------------------------------------------|----------------------------------------------------------------------------------------------------------------|------------|------------|
| 001 | District Name<br>(জেলার নাম)                         | 1. Mymensingh<br>ময়মনসিংহ<br>2. Rangpur<br>রংপুর<br>3. Lalmonirhat<br>লালমনিরহাট<br>4. Kurigram<br>কুড়িগ্রাম | _____      |            |
| 002 | Upazila Name<br>(উপজেলার নাম)                        |                                                                                                                | _____      |            |
| 003 | Upazila Condition<br>(উপজেলার ধরন)                   | 1. Intervention<br>(ইন্টারভেনশন)<br>2. Control<br>(কন্ট্রোল)                                                   | _____      |            |
| 004 | Data Collector Name<br>(তথ্য সংগ্রহকারীর নাম)        |                                                                                                                | _____      |            |
| 005 | Participant ID Number<br>(তথ্য প্রদানকারীর আই ডি নং) |                                                                                                                | _____      |            |
| 010 | Monthly income of family<br>(পারিবারিক মাসিক আয়)    | Amount in taka[Enter 9999 if unknown<br>টাকার পরিমাণে লিখুন ( তথ্য অজানা থাকলে ৯৯৯ লিখুন)                      | _____ taka |            |

বাংলাদেশ ম্যাট্রনাল আউট কাম নিউটিশন ইন্টারভেনশন ডাটা এবসটাকশন ফরম ভার্সন ১.০

এফএইচআই ৩৬০ গবেষণা #৯৪৯৭৫৭

পিএইচসি তে জমা দেবার তারিখঃ ২৭ অগাস্ট ২০১৬

পরিমার্জিত : ২৭ অগাস্ট ২০১৬

|                                           |                                                                                                     |                                                                                                                                                                                                                                  |                                  |                                   |
|-------------------------------------------|-----------------------------------------------------------------------------------------------------|----------------------------------------------------------------------------------------------------------------------------------------------------------------------------------------------------------------------------------|----------------------------------|-----------------------------------|
| 011                                       | Number of household members<br>(পরিবারের সদস্য সংখ্যা)                                              | Total living in the house<br>(বাড়িতে কতজন লোক বাস করে)                                                                                                                                                                          | _____                            |                                   |
| <b>Obstetric History &amp; ANC Course</b> |                                                                                                     |                                                                                                                                                                                                                                  |                                  |                                   |
| 100                                       | Patient's Age in years at 1 <sup>st</sup> ANC Visit<br>(প্রথম এএনসি ভিজিটের সময় রোগীর বয়স কত ছিল) | Number of years<br>(Mark 99 if no data)<br>সংখ্যায় লিখুন (কোন তথ্য না থাকলে ৯৯ লিখুন)                                                                                                                                           | _____ years                      | Check logic based on # deliveries |
| 101                                       | Number prior pregnancies (gravida)<br>(including this pregnancy)<br>গর্ভ নং( বর্তমানটি সহ)          | Number of pregnancies<br>(Will be 01 if first pregnancy; include miscarriages)<br>গর্ভ সংখ্যা (যদি প্রথম গর্ভ হয়, তবে ০১ হবে; অপরিণত গর্ভ সহ অন্তর্ভুক্ত হবে)                                                                   | _____                            |                                   |
| 102                                       | LMP (first date last menstrual period)<br>এল এম পি(শেষ মাসিকের তারিখ)                               | Day/month/year<br>Gregorian; for single digit month, write 0 first (ex: July=07) If missing, write 99/99/99<br>(দিন/মাস/বছর)<br>যদি সংখ্যা একটি হয় তবে তার আগে ০ লিখুন (যেমন জুলাই=০৭)<br>তথ্য না থাকলে ৯৯/৯৯/৯৯ লিখুন)         | ____/____/____<br>____/____/____ |                                   |
| 103                                       | Estimated Date Delivery (EDD)<br>প্রসবের সম্ভাব্য তারিখ(ইডিডি)                                      | Day/month/year<br>Gregorian; for single digit day or month, write 0 first (ex: July=07). If missing, write 99/99/99<br>(দিন/মাস/বছর)<br>যদি সংখ্যা একটি হয় তবে তার আগে ০ লিখুন (যেমন জুলাই=০৭)<br>তথ্য না থাকলে ৯৯/৯৯/৯৯ লিখুন) | ____/____/____<br>____/____/____ |                                   |
| 104                                       | Date First ANC Visit by SK<br>(স্বাস্থ্যকর্মীর প্রথম এএনসি ভিজিটের তারিখ)                           | Day/month/year<br>Gregorian; for single digit day or month, write 0 first (ex: July=07). If missing, write 99/99/99<br>(দিন/মাস/বছর)                                                                                             | ____/____/____<br>____/____/____ |                                   |

বাংলাদেশ ম্যাটার্নাল আউট কাম নিউটিশন ইনটারভেনশন ডাটা এবসটাকশন ফরম ভার্সন ১.০  
এফএইচআই ৩৬০ গবেষণা #৯৪৯৭৫৭  
পিএইচসি তে জমা দেবার তারিখঃ ২৭ অগাস্ট ২০১৬  
পরিমার্জিত : ২৭ অগাস্ট ২০১৬

|     |                                                                                                       |                                                                                                                                                                                        |                                                                 |                                                            |
|-----|-------------------------------------------------------------------------------------------------------|----------------------------------------------------------------------------------------------------------------------------------------------------------------------------------------|-----------------------------------------------------------------|------------------------------------------------------------|
|     |                                                                                                       | যদি সংখ্যা একটি হয় তবে তার আগে ০ লিখুন (যেমন জুলাই=০৭) তথ্য না থাকলে ৯৯/৯৯/৯৯ লিখুন)                                                                                                  |                                                                 |                                                            |
| 105 | Gestational age at first ANC<br>(প্রথম এএনসি ভিজিটে গর্ভের বয়স)                                      | Use special calendar to calculate based on EDD and date of first visit.<br>(প্রথম এএনসি ভিজিট ও প্রসবের সম্ভাব্য তারিখগণনার মাধ্যমে করে বের করুন)                                      | ____ ____ (weeks),<br>____ ____ (days)                          | Use provided calendar and LMP                              |
| 106 | Blood pressure at first ANC visit<br>প্রথম এএনসি ভিজিটের সময় রক্তচাপ                                 | To record double digit number, make first number 0; for example, 120/60 record as 120/060.<br>(দুই সংখ্যার নাম্বার এর জন্য প্রথমে ০ ব্যবহার করুন যেমন ১২০/৬০ লেখার জন্য ১২০/০৬০ লিখুন) | ____ ____ ____/<br>____ ____ ____<br>[Enter 999/999 if missing] |                                                            |
| 107 | Maternal weight at first ANC visit<br>(প্রথম এএনসি ভিজিটে মায়ের ওজন)                                 | In kg<br>(কেজি তে লিখুন)                                                                                                                                                               | ____ ____ ____<br>[Enter 999 if missing]                        |                                                            |
| 108 | Hemoglobin number available for first ANC visit?<br>(প্রথম এএনসি ভিজিটে হিমোগ্লোবিন পরিমাণ)           | 1. Yes-হ্যাঁ<br>2. No-না                                                                                                                                                               | _____                                                           | If no (2), go to 110.<br>(যদি না(২) হয় তবে ১১০ যেতে হবে।) |
| 109 | Hemoglobin at first visit (red book)<br>(প্রথম এএনসি ভিজিটে হিমোগ্লোবিন (এমসিএইচএন হ্যান্ড বুক দেখুন) | In gm/dL, watch for decimal point<br>(গ্রাম/ ডিএল এ লিখুন, ডেসিম্যাল পয়েন্ট লক্ষ রাখুন)                                                                                               | ____ ____ . ____                                                |                                                            |
| 110 | Date Last ANC Visit by SK<br>(স্বাস্থ্যকর্মী কর্তৃক শেষ এএনসি ভিজিটের তারিখ)                          | Day/month/year<br>Gregorian; for single digit day or month, write 0 first (ex: July=07). If missing, write 99/99/99<br>(দিন/মাস/বছর)                                                   | ____ ____ / ____<br>____ / ____ ____                            |                                                            |

বাংলাদেশ ম্যাটারনাল আউট কাম নিউটিশন ইনটারভেনশন ডাটা এবসটাকশন ফরম ভার্সন ১.০  
এফএইচআই ৩৬০ গবেষণা #৯৪৯৭৫৭  
পিএইচসি তে জমা দেবার তারিখঃ ২৭ অগাস্ট ২০১৬  
পরিমার্জিত : ২৭ অগাস্ট ২০১৬

|     |                                                                                                  |                                                                                                                                                                                                                    |                                                                 |                                                       |
|-----|--------------------------------------------------------------------------------------------------|--------------------------------------------------------------------------------------------------------------------------------------------------------------------------------------------------------------------|-----------------------------------------------------------------|-------------------------------------------------------|
|     |                                                                                                  | যদি সংখ্যা একটি হয় তবে তার আগে ০ লিখুন (যেমন জুলাই=০৭) তথ্য না থাকলে ৯৯/৯৯/৯৯ লিখুন)                                                                                                                              |                                                                 |                                                       |
| 111 | Gestational age at last ANC visit<br>(শেষ এএনসি ভিজিটে গর্ভের বয়স )                             | Use special calendar to calculate based on EDD and date of last visit<br>(প্রথম এএনসি ভিজিট ও প্রসবের সম্ভাব্য তারিখগণনার মাধ্যমে করে বের করুন)                                                                    | ____ ____ (weeks),<br>____ ____ (days)                          |                                                       |
| 112 | Blood pressure at last ANC visit<br>(শেষ এএনসি ভিজিটের সময় রক্তচাপ)                             | To record double digit number, make first number 0; for example, 120/60 record as 120/060<br>(দুই সংখ্যার নাম্বার এর জন্য প্রথমে ০ ব্যবহার করুন যেমন ১২০/৬০ লেখার জন্য ১২০/০৬০ লিখুন)                              | ____ ____ ____/<br>____ ____ ____<br>[Enter 999/999 if missing] |                                                       |
| 113 | Maternal weight at last ANC visit<br>(শেষ এএনসি ভিজিটে মায়ের ওজন)                               | In kg<br>(কেজি তে লিখুন)                                                                                                                                                                                           | ____ ____ ____<br>[Enter 999 if missing]                        |                                                       |
| 114 | Hemoglobin number available for last ANC visit(শেষ এএনসি ভিজিটে হিমোগ্লোবিন পরিমাণ )             | 1. Yes- হ্যাঁ<br>2. No- না                                                                                                                                                                                         | _____                                                           | If no (2), go to 116. (যদি না হয়, তবে ১১৬ যেতে হবে।) |
| 115 | Hemoglobin at last visit (red book)<br>(শেষ এএনসি ভিজিটে হিমোগ্লোবিন (এমসিএইচ হ্যান্ড বুক দেখুন) | In gm/dL, watch for decimal point<br>(গ্রাম/ ডিএল এ লিখুন, ডেসিম্যাল পয়েন্ট লক্ষ রাখুন)                                                                                                                           | _____. ____                                                     |                                                       |
| 116 | Date last ANC hemoglobin<br>(শেষ এএনসি ভিজিটে হিমোগ্লোবিন পরিমাপের তারিখ)                        | Day/month/year Gregorian; for single digit day or month, write 0 first (ex: July=07). If missing, write 99/99/99(দিন/মাস/বছর যদি সংখ্যা একটি হয় তবে তার আগে ০ লিখুন (যেমন জুলাই=০৭) তথ্য না থাকলে ৯৯/৯৯/৯৯ লিখুন) | ____ ____/<br>____/ ____ ____                                   |                                                       |

বাংলাদেশ ম্যাটারনাল আউট কাম নিউটিশন ইনটারভেনশন ডাটা এবসটাকশন ফরম ভার্সন ১.০

এফএইচআই ৩৬০ গবেষণা #৯৪৯৭৫৭

পিএইচসি তে জমা দেবার তারিখঃ ২৭ অগাস্ট ২০১৬

পরিমার্জিত : ২৭ অগাস্ট ২০১৬

|     |                                                                                                                                                                                                                                                                                                                 |                                                                                                                                                                                                                                                                                                                                                                                                                                  |                                        |                                                                                                   |
|-----|-----------------------------------------------------------------------------------------------------------------------------------------------------------------------------------------------------------------------------------------------------------------------------------------------------------------|----------------------------------------------------------------------------------------------------------------------------------------------------------------------------------------------------------------------------------------------------------------------------------------------------------------------------------------------------------------------------------------------------------------------------------|----------------------------------------|---------------------------------------------------------------------------------------------------|
| 117 | Gestational age at last ANC hemoglobin<br>(শেষ এএনসি ভিজিটে হিমোগ্লোবিন পরিমাপেরতারিখের দিন গর্ভের বয়স)                                                                                                                                                                                                        | Use special calendar to calculate based on EDD and date of Hgb measure<br>(প্রথম এএনসি ভিজিট ও প্রসবের সম্ভাব্য তারিখগণনার মাধ্যমে করে বের করুন)                                                                                                                                                                                                                                                                                 | ____ ____ (weeks),<br>____ ____ (days) |                                                                                                   |
| 118 | Was urine dipstick done at last ANC visit?<br>(শেষ এএনসি ভিজিটে পস্রাব পরীক্ষা করা হয়েছে কি?)                                                                                                                                                                                                                  | 1. Yes- হ্যাঁ<br>2. No- না                                                                                                                                                                                                                                                                                                                                                                                                       | _____                                  | If no, go to 120.<br>(যদি না হয়, তবে ১২০ যেতে হবে।)                                              |
| 119 | Urine dip results at last ANC visit<br>(শেষ এএনসি ভিজিটে পস্রাব পরীক্ষার ফলাফল)                                                                                                                                                                                                                                 | 1.Negative for albumin and glucose<br>(এলবুমিন এবং সুগার নাই)<br>2. Positive for albumin only<br>(শুধুমাত্র এলবুমিন আছে)<br>3.Positive for glucose only<br>(শুধুমাত্র সুগার আছে)<br>4. Positive for both albumin and glucose(এলবুমিন এবং সুগার উভয়ই আছে)                                                                                                                                                                        | _____                                  |                                                                                                   |
| 120 | Complications reported during pregnancy:<br>Review all ANC visits in SK register and red book before responding. Multiple answers permitted as applicable<br>(গর্ভকালীন সময়ে কোন জটিলতা থেকে থাকলে : স্বাস্থ্যকর্মী কর্তৃক সকল এএনসি ভিজিট এবং এমসিএইচ হ্যান্ড বুক যাচাই করুন। )<br>(একাধিক উত্তর গ্রহন যোগ্য) | 1.No complications<br>(কোন জটিলতা ছিল না)<br>2.Severe nausea/vomiting(বমি বমি ভাব/বমি হওয়া)<br>3.High blood pressure<br>(উচ্চ রক্তচাপ)<br>4.Severe edema<br>(হাত-পায়ের পাতায় পানি আসা)<br>5.Low weight gain<br>(ওজন কম বাড়়া)<br>6.Gestational diabetes(গর্ভকালীন সময়ে ডায়াবেটিস)<br>7.Fever/infections(জ্বর/সংক্রমণ)<br>8.Vaginal bleeding(যোনিপথে রক্তপাত )<br>9.Preterm labor<br>(নির্ধারিত সময়ের পূর্বে প্রসব ব্যাথা) | _____<br>_____<br>_____<br>_____       | [If single digit, add 0 as first number. Ex: Severe edema=04]<br><br>If need to specify:<br>_____ |

বাংলাদেশ ম্যাটার্নাল আউট কাম নিউটিশন ইনটারভেনশন ডাটা এবসটাকশন ফরম ভার্সন ১.০  
এফএইচআই ৩৬০ গবেষণা #৯৪৯৭৫৭  
পিএইচসি তে জমা দেবার তারিখঃ ২৭ অগাস্ট ২০১৬  
পরিমার্জিত : ২৭ অগাস্ট ২০১৬

|     |                                                                                                                                                                                                                  |                                                                                                                                                                                                                                                |                                        |                                                                      |
|-----|------------------------------------------------------------------------------------------------------------------------------------------------------------------------------------------------------------------|------------------------------------------------------------------------------------------------------------------------------------------------------------------------------------------------------------------------------------------------|----------------------------------------|----------------------------------------------------------------------|
|     |                                                                                                                                                                                                                  | <p>10. Leakage of fluid/preterm rupture of membranes<br/>(পানি বের হয়ে যাওয়া/.....)</p> <p>11.Symptomatic anemia(রক্তাল্পতার লক্ষণ)</p> <p>12.Other<br/>(specify):অন্যান্য(উল্লেখ্যকরণ)</p>                                                  | _____                                  |                                                                      |
| 121 | <p>Was patient referred to hospital for any complication during pregnancy? [Consult red book]<br/>(গর্ভ কালীন সময়ে কোন জটিলতার কারণে রোগীকে কি হাসপাতালে পাঠানো হয়েছিল?)<br/>(এমসিএইচএন হ্যান্ড বুক দেখুন)</p> | <p>1. Yes- হ্যাঁ<br/>2. No- না</p>                                                                                                                                                                                                             | _____                                  | <p>If no (2), go to 123<br/>(যদি না (২) হয়, তাহলে ১২৩ যেতে হবে)</p> |
| 122 | <p>If yes, dates of hospitalization/referral visit<br/>(যদি হ্যাঁ হয় তাহলে হাসপাতালে গমন/ভর্তির তারিখ )</p>                                                                                                     | <p>Day/month/year<br/>Gregorian; for single digit month or day, write 0 first<br/>(ex: July=07). If missing, write 99/99/99<br/>(দিন/মাস/বছর<br/>যদি সংখ্যা একটি হয় তবে তার আগে ০ লিখুন (যেমন জুলাই=০৭)<br/>তথ্য না থাকলে ৯৯/৯৯/৯৯ লিখুন)</p> | _____/_____/_____<br>_____/_____/_____ |                                                                      |
| 123 | <p>Number doses tetanus toxoid vaccination received<br/>(টিটি টীকার কততম ডোজ নিয়েছে)</p>                                                                                                                        | <p>Count in register or red book<br/>(রেজিস্টার অথবা এমসিএইচএন হ্যান্ড বুক দেখুন)</p>                                                                                                                                                          | _____                                  |                                                                      |
| 124 | <p>Total number of ANC visits at facility<br/>(স্বাস্থ্য কেন্দ্রে কতবার এএনসি ভিজিটে যাওয়া হয়েছিলো)</p>                                                                                                        | <p>Count in red book<br/>(এমসিএইচএন হ্যান্ড বুক দেখে যোগ করুন)</p>                                                                                                                                                                             | _____                                  |                                                                      |
| 125 | <p>Total number ANC visits by SK<br/>(স্বাস্থ্য কর্মী দ্বারা কতবার এএনসি ভিজিট করা হয়েছিলো)</p>                                                                                                                 | <p>Count in register<br/>(রেজিস্টারদেখে যোগ করুন)</p>                                                                                                                                                                                          | _____                                  |                                                                      |

বাংলাদেশ ম্যাট্রনাল আউট কাম নিউটিশন ইনটারভেনশন ডাটা এবসটাকশন ফরম ভার্সন ১.০

এফএইচআই ৩৬০ গবেষণা #৯৪৯৭৫৭

পিএইচসি তে জমা দেবার তারিখঃ ২৭ অগাস্ট ২০১৬

পরিমার্জিত : ২৭ অগাস্ট ২০১৬

| Nutrition Indicators |                                                                                                                                                 |                                                                                                                                     |                                                                                |
|----------------------|-------------------------------------------------------------------------------------------------------------------------------------------------|-------------------------------------------------------------------------------------------------------------------------------------|--------------------------------------------------------------------------------|
| 200                  | At which month ANC visit were IFA tablets consumed first recorded?<br>(কোন মাসের এএনসি ভিজিট এ প্রথম আয়রন ট্যাবলেট দেয়া হয়েছিল)              | Enter visit month where number of tablets eaten is first recorded.                                                                  | _____                                                                          |
| 201                  | Number IFA tablets reported consumed at first recorded ANC entry<br>(প্রথম রেকর্ডকৃত মাসে আয়রন ট্যাবলেট খাওয়ার সংখ্যা)                        | Enter total from register; enter 99 for missing data<br>(মোট সংখ্যা টি রেজিস্টার দেখে যোগ করুন। তথ্য না থাকলে ৯৯ লিখুন।)            | _____                                                                          |
| 202                  | Number IFA tablets reported consumed at last recorded ANC entry<br>(শেষ রেকর্ডকৃত মাসে আয়রন ট্যাবলেট খাওয়ার সংখ্যা)                           | Enter total from register; enter 99 for missing data<br>(মোট সংখ্যা টি রেজিস্টার দেখে যোগ করুন। তথ্য না থাকলে ৯৯ লিখুন।)            | _____                                                                          |
| 203                  | At which month of ANC visit were calcium tablets consumed first recorded?<br>(কোন মাসের এএনসি ভিজিট এ প্রথম ক্যালসিয়াম ট্যাবলেট দেয়া হয়েছিল) | At which month ANC visit were calcium tablets consumed first recorded?<br>(প্রথম রেকর্ডের কোন মাস থেকে খাওয়া শুরু করেছে তা লিখুন।) | _____                                                                          |
| 204                  | Number calcium tablets reported consumed at first recorded ANC entry<br>(প্রথম রেকর্ডকৃত মাসে ক্যালসিয়াম ট্যাবলেট খাওয়ার সংখ্যা )             | Enter total from register; enter 99 for missing data<br>(মোট সংখ্যা টি রেজিস্টার দেখে যোগ করুন। তথ্য না থাকলে ৯৯ লিখুন।)            | _____                                                                          |
| 205                  | Number calcium tablets reported consumed at last recorded ANC entry<br>(শেষ ক্যালসিয়াম মাসে ক্যালসিয়াম ট্যাবলেট খাওয়ার সংখ্যা)               | Enter total from register; enter 99 for missing data<br>(মোট সংখ্যা টি রেজিস্টার দেখে যোগ করুন। তথ্য না থাকলে ৯৯ লিখুন।)            | _____                                                                          |
|                      |                                                                                                                                                 |                                                                                                                                     | If control upazila, go to 300.<br>(যদি কন্ট্রোল উপজেলা হয়, তবে ৩০০ যেতে হবে।) |

বাংলাদেশ ম্যাট্রনাল আউট কাম নিউটিশন ইনটারভেনশন ডাটা এবসটাকশন ফরম ভার্সন ১.০  
এফএইচআই ৩৬০ গবেষণা #৯৪৯৭৫৭  
পিএইচসি তে জমা দেবার তারিখঃ ২৭ অগাস্ট ২০১৬  
পরিমার্জিত : ২৭ অগাস্ট ২০১৬

| For intervention upazilas only (see SK register) at first ANC visit: |                                                                                                         |                                                                                                              |       |                                                                              |
|----------------------------------------------------------------------|---------------------------------------------------------------------------------------------------------|--------------------------------------------------------------------------------------------------------------|-------|------------------------------------------------------------------------------|
| 206                                                                  | FishMeat/Liver taken within 4 hours<br>(গত ২৪ ঘন্টায় মাছ, মাংস এবং কলিজা খেয়েছেন?)                    | 1. Yes- হ্যাঁ<br>2. No- না<br>9. Data missing-<br>(তথ্য বাদ পড়েছে)                                          | _____ | If no, go to 208.<br>(যদি না হয়, তবে ২০৮ যেতে হবে।)                         |
| 207                                                                  | Amount (bowl)<br>{ পরিমান(বাটিতে) }                                                                     | Enter stated number of bowl(s), or 99 for missing data<br>(পরিমান বোলে লিখুন, বাধ পড়া তথ্যের জন্য ৯৯ চাপুন) | _____ |                                                                              |
| 208                                                                  | Egg taken within 24 hours<br>(গত ২৪ ঘন্টায় ডিম খেয়েছেন?)                                              | 1. Yes- হ্যাঁ<br>2. No-না<br>9. Data missing<br>(তথ্য বাদ পড়েছে)                                            | _____ | If no, go to 210.<br>(যদি না হয় তবে ২১০ যেতে হবে)                           |
| 209                                                                  | Amount (bowl)<br>[পরিমান(বাটিতে)]                                                                       | Enter stated number of bowl(s), or 99 for missing data<br>(পরিমান বোলে লিখুন, বাধ পড়া তথ্যের জন্য ৯৯ লিখুন) | _____ |                                                                              |
| 210                                                                  | Milk /Milk Products taken within last 24 hours<br>(২৪ ঘন্টায় দুধ/ দুধের তৈরী খাবার খেয়েছেন?)          | 1. Yes- হ্যাঁ<br>2. No- না<br>9. Data missing<br>(তথ্য বাদ পড়েছে)                                           | _____ | If no/missing, go to 212.<br>(যদি না হয়/বাদ পড়া তথ্যের জন্য ২১২ যেতে হবে।) |
| 211                                                                  | Amount (bowl)<br>[পরিমান(বাটিতে)]                                                                       | Enter stated number of bowl(s), or 99 for missing data<br>(পরিমান বোলে লিখুন, বাধ পড়া তথ্যের জন্য ৯৯ লিখুন) | _____ |                                                                              |
| 212                                                                  | Orange/yellow vegetable/fruit taken within last 24 hours<br>(গত ২৪ ঘন্টায় কমলা /হলুদ সজি/ফল খেয়েছেন?) | 1. Yes- হ্যাঁ<br>2. No- না<br>9. Data missing<br>(তথ্য বাদ পড়েছে)                                           | _____ | If no/missing, go to 214.<br>(যদি না হয়/বাদ পড়া তথ্যের জন্য                |

বাংলাদেশ ম্যাটারনাল আউট কাম নিউটিশন ইনটারভেনশন ডাটা এবসটাকশন ফরম ভার্সন ১.০  
এফএইচআই ৩৬০ গবেষণা #৯৪৯৭৫৭  
পিএইচসি তে জমা দেবার তারিখঃ ২৭ অগাস্ট ২০১৬  
পরিমার্জিত : ২৭ অগাস্ট ২০১৬



|     |                                                                                             |                                                                                                              |       |                                                                                |
|-----|---------------------------------------------------------------------------------------------|--------------------------------------------------------------------------------------------------------------|-------|--------------------------------------------------------------------------------|
|     |                                                                                             |                                                                                                              |       | ২১৪ যেতে হবে।)                                                                 |
| 213 | Amount (bowl)<br>[পরিমাণ(বাটিতে)]                                                           | Enter stated number of bowl(s), or 99 for missing data<br>(পরিমাণ বোলে লিখুন, বাধ পড়া তথ্যের জন্য ৯৯ চাপুন) | _____ |                                                                                |
| 214 | Rice/ Bread taken within last 24 hours<br>(গত ২৪ ঘন্টায় ভাত/রুটি খেয়েছেন?)                | 1. Yes- হ্যাঁ<br>2. No- না<br>9. Data missing<br>(তথ্য বাদ পড়েছে)                                           | _____ | If no/ missing, go to 216.<br>(যদি না হয়/ বাদ পড়া তথ্যের জন্য ২১৬ যেতে হবে।) |
| 215 | Amount (bowl)<br>[পরিমাণ(বাটিতে)]                                                           | Enter stated number of bowl(s), or 99 for missing data<br>(পরিমাণ বোলে লিখুন, বাধ পড়া তথ্যের জন্য ৯৯ লিখুন) | _____ |                                                                                |
| 216 | Dark Green Vegetables taken within last 24 hours<br>(গত ২৪ ঘন্টায় গাঢ় সবুজ শাক খেয়েছেন?) | 1. Yes- হ্যাঁ<br>2. No- না<br>9. Data missing<br>(তথ্য বাদ পড়েছে)                                           | _____ | If no/ missing, go to 218.<br>(যদি না হয়/বাদ পড়া তথ্যের জন্য ২১৮ যেতে হবে।)  |
| 217 | Amount (bowl)<br>[পরিমাণ(বাটিতে)]                                                           | Enter stated number of bowl(s), or 99 for missing data<br>(পরিমাণ বোলে লিখুন, বাধ পড়া তথ্যের জন্য ৯৯ লিখুন) | _____ |                                                                                |
| 218 | Thick Lentils taken within last 24 hours<br>(গত ২৪ ঘন্টায় ঘন ডাল খেয়েছেন?)                | 1. Yes- হ্যাঁ<br>2. No- না<br>9. Data missing<br>(তথ্য বাদ পড়েছে)                                           | _____ | If no/ missing, go to 220.<br>(যদি না হয়/বাদ পড়া তথ্যের জন্য ২২০ যেতে হবে।)  |

বাংলাদেশ ম্যাটারনাল আউট কাম নিউটিশন ইনটারভেনশন ডাটা এবসটাকশন ফরম ভার্সন ১.০  
এফএইচআই ৩৬০ গবেষণা #৯৪৯৭৫৭  
পিএইচসি তে জমা দেবার তারিখঃ ২৭ অগাস্ট ২০১৬  
পরিমার্জিত : ২৭ অগাস্ট ২০১৬

|                                                                     |                                                                                                   |                                                                                                              |       |                                                                            |
|---------------------------------------------------------------------|---------------------------------------------------------------------------------------------------|--------------------------------------------------------------------------------------------------------------|-------|----------------------------------------------------------------------------|
| 219                                                                 | Amount (bowl)<br>[পরিমাণ(বাটিতে)]                                                                 | Enter stated number of bowl(s), or 99 for missing data<br>(পরিমাণ বোলে লিখুন, বাধ পড়া তথ্যের জন্য ৯৯ লিখুন) | _____ |                                                                            |
| For intervention upazilas only (see SK register) at last ANC visit: |                                                                                                   |                                                                                                              |       |                                                                            |
| 220                                                                 | Fish/ Meat/Liver taken within last 24 hours<br>(গত২৪ ঘন্টায় মাছ/ মাংস/ কলিজা খেয়েছেন?)          | 1. Yes- হ্যাঁ<br>2. No- না<br>9. Data missing<br>(তথ্য বাদ পড়েছে)                                           | _____ | If no/ missing, go to 222(যদি না হয়/বাদ পড়া তথ্যের জন্য ২২২ যেতে হবে।)   |
| 221                                                                 | Amount (bowl)<br>[পরিমাণ(বাটিতে)]                                                                 | Enter stated number of bowl(s), or 99 for missing data<br>(পরিমাণ বোলে লিখুন, বাধ পড়া তথ্যের জন্য ৯৯ লিখুন) | _____ |                                                                            |
| 222                                                                 | Egg taken within 24 hours<br>(গত ২৪ ঘন্টায় ডিম খেয়েছেন?)                                        | 1. Yes- হ্যাঁ<br>2. No- না<br>9. Data missing<br>(তথ্য বাদ পড়েছে)                                           | _____ | If no/ missing, go to 224. (যদি না হয়/বাদ পড়া তথ্যের জন্য ২২৪ যেতে হবে।) |
| 223                                                                 | Amount (bowl)<br>[পরিমাণ(বাটিতে)]                                                                 | Enter stated number of bowl(s), or 99 for missing data<br>(পরিমাণ বোলে লিখুন, বাধ পড়া তথ্যের জন্য ৯৯ লিখুন) | _____ |                                                                            |
| 224                                                                 | Milk /Milk Products taken within last 24 hours<br>(গত ২৪ ঘন্টায় দুধ/ দুধের তৈরী খাবার খেয়েছেন?) | 1. Yes- হ্যাঁ<br>2. No- না<br>9. Data missing<br>(তথ্য বাদ পড়েছে)                                           | _____ | If no/ missing, go to 226. (যদি না হয়/বাদ পড়া তথ্যের জন্য ২২৬ যেতে হবে।) |

বাংলাদেশ ম্যাটারনাল আউট কাম নিউটিশন ইনটারভেনশন ডাটা এবসটাকশন ফরম ভার্সন ১.০  
এফএইচআই ৩৬০ গবেষণা #৯৪৯৭৫৭  
পিএইচসি তে জমা দেবার তারিখঃ ২৭ অগাস্ট ২০১৬  
পরিমার্জিত : ২৭ অগাস্ট ২০১৬

|     |                                                                                                          |                                                                                                              |       |                                                                              |
|-----|----------------------------------------------------------------------------------------------------------|--------------------------------------------------------------------------------------------------------------|-------|------------------------------------------------------------------------------|
| 225 | Amount (bowl)<br>[পরিমান(বাটিতে)]                                                                        | Enter stated number of bowl(s), or 99 for missing data<br>(পরিমান বোলে লিখুন, বাধ পড়া তথ্যের জন্য ৯৯ লিখুন) | _____ |                                                                              |
| 226 | Orange/yellow vegetable/fruit taken within last 24 hours<br>(গত ২৪ ঘন্টায় কমলা/হলুদ সর্জি/ফল খেয়েছেন?) | 1. Yes- হ্যাঁ<br>2. No- না<br>9. Data missing<br>(তথ্য বাদ পড়েছে)                                           | _____ | If no/missing, go to 228.<br>(যদি না হয়/বাদ পড়া তথ্যের জন্য ২২৮ যেতে হবে।) |
| 227 | Amount (bowl)<br>[পরিমান(বাটিতে)]                                                                        | Enter stated number of bowl(s), or 99 for missing data<br>(পরিমান বোলে লিখুন, বাধ পড়া তথ্যের জন্য ৯৯ লিখুন) | _____ |                                                                              |
| 228 | Rice/ Bread taken within last 24 hours<br>(গত ২৪ ঘন্টায় ভাত/রুটি খেয়েছেন?)                             | 1. Yes- হ্যাঁ<br>2. No- না<br>9. Data missing<br>(তথ্য বাদ পড়েছে)                                           | _____ | If no/missing, go to 230.<br>(যদি না হয়/বাদ পড়া তথ্যের জন্য ২৩০ যেতে হবে।) |
| 229 | Amount (bowl)<br>[পরিমান(বাটিতে)]                                                                        | Enter stated number of bowl(s), or 99 for missing data<br>(পরিমান বোলে লিখুন, বাধ পড়া তথ্যের জন্য ৯৯ লিখুন) | _____ |                                                                              |
| 230 | Dark Green Vegetables taken within last 24 hours<br>(গত ২৪ ঘন্টায় গাঢ় সবুজ শাক খেয়েছেন?)              | 1. Yes- হ্যাঁ<br>2. No- না<br>9. Data missing<br>(তথ্য বাদ পড়েছে)                                           | _____ | If no/missing, go to 232.<br>(যদি না হয়/বাদ পড়া তথ্যের জন্য ২৩২ যেতে হবে।) |
| 231 | Amount (bowl)<br>[পরিমান(বাটিতে)]                                                                        | Enter stated number of bowl(s), or 99 for missing data                                                       | _____ |                                                                              |

বাংলাদেশ ম্যাটারনাল আউট কাম নিউট্রিশন ইনটারভেনশন ডাটা এবসটাকশন ফরম ভার্সন ১.০

এফএইচআই ৩৬০ গবেষণা #৯৪৯৭৫৭

পিএইচসি তে জমা দেবার তারিখঃ ২৭ অগাস্ট ২০১৬

পরিমার্জিত : ২৭ অগাস্ট ২০১৬

|                                               |                                                                              |                                                                                                                                                                                                                                                    |                                               |                                                                           |
|-----------------------------------------------|------------------------------------------------------------------------------|----------------------------------------------------------------------------------------------------------------------------------------------------------------------------------------------------------------------------------------------------|-----------------------------------------------|---------------------------------------------------------------------------|
|                                               |                                                                              | (পরিমাণ বোলে লিখুন, বাধ পড়া তথ্যের জন্য ৯৯ লিখুন)                                                                                                                                                                                                 |                                               |                                                                           |
| 232                                           | Thick Lentils taken within last 24 hours<br>(গত ২৪ ঘন্টায় ঘন যাল খেয়েছেন?) | 1. Yes- হ্যাঁ<br>2. No- না<br>9. Data missing<br>(তথ্য বাদ পড়েছে)                                                                                                                                                                                 | _____                                         | If no/missing, go to 300. (যদি না হয়/বাদ পড়া তথ্যের জন্য ৩০০ যেতে হবে।) |
| 233                                           | Amount (bowl)<br>[পরিমাণ(বাটিতে)]                                            | Enter stated number of bowl(s), or 99 for missing data<br>(পরিমাণ বোলে লিখুন, বাধ পড়া তথ্যের জন্য ৯৯ লিখুন)                                                                                                                                       | _____                                         |                                                                           |
| <b>Delivery/Postpartum Period Information</b> |                                                                              |                                                                                                                                                                                                                                                    |                                               |                                                                           |
|                                               | Date of delivery<br>(প্রসবের তারিখ)                                          | Day/month/year<br>Gregorian; for single digit month or day, write 0 first (ex: July=07). If missing, write 99/99/99<br>(দিন/মাস/বছর। বাদ পড়া তথ্যের জন্য ৯৯/৯৯/৯৯ লিখুন)                                                                          | _____/_____/_____<br>_____/_____/_____        | Logic check with EDD/LMP.(<br>ইডিডি/এলএমপি চেক করতে হবে।)                 |
| 301                                           | Place of delivery<br>(প্রসবের স্থান)                                         | 1. Patient's home<br>(নিজের বাড়ী)<br>2. Patient's mother's home<br>(বাবার বাড়ী)<br>3. Midwife's home<br>(ধাত্রী বাড়ী)<br>4. Hospital<br>(হাসপাতাল)<br>5. Other (specify):<br>[অন্যান্য(নির্দিষ্ট করুন)]<br>6. Data missing<br>(তথ্য বাদ পড়েছে) | _____<br>Specify:(নির্দিষ্টকরণ)_____<br>_____ |                                                                           |
| 302                                           | Skilled birth attendant present?<br>(এস বি এ উপস্থিত ছিল?)                   | 1. Yes- হ্যাঁ<br>2. No- না<br>3. Data missing<br>(তথ্য বাদ পড়েছে)                                                                                                                                                                                 | _____                                         |                                                                           |
| 303                                           | Type of delivery                                                             | 1. Vaginal                                                                                                                                                                                                                                         |                                               |                                                                           |

বাংলাদেশ ম্যাটারনাল আউট কাম নিউটিশন ইনটারভেনশন ডাটা এবসটাকশন ফরম ভার্সন ১.০

এফএইচআই ৩৬০ গবেষণা #৯৪৯৭৫৭

পিএইচসি তে জমা দেবার তারিখঃ ২৭ অগাস্ট ২০১৬

পরিমার্জিত : ২৭ অগাস্ট ২০১৬

|     |                                                                                                                                                                              |                                                                                                                                                                                                                                                                                                                                                                                                                          |                                                          |                                                                                                                          |
|-----|------------------------------------------------------------------------------------------------------------------------------------------------------------------------------|--------------------------------------------------------------------------------------------------------------------------------------------------------------------------------------------------------------------------------------------------------------------------------------------------------------------------------------------------------------------------------------------------------------------------|----------------------------------------------------------|--------------------------------------------------------------------------------------------------------------------------|
|     | (প্রসবের ধরন)                                                                                                                                                                | স্বাভাবিক<br>2. Cesarean section<br>সিজার<br>3. Assisted vaginal<br>(vacuum) ভেকুম                                                                                                                                                                                                                                                                                                                                       | _____                                                    |                                                                                                                          |
| 304 | Misoprostol received<br>for PPH prevention?<br>(প্রসবের সাথে সাথেই অতিরিক্ত<br>রক্ত ক্ষরণ বন্ধের জন্য<br>মিসোপ্রস্টাল খেয়েছেন?)                                             | 1. Yes- হ্যাঁ<br>2. No- না<br>9. Data missing<br>(তথ্য বাদ পড়েছে)                                                                                                                                                                                                                                                                                                                                                       | _____                                                    |                                                                                                                          |
| 305 | Maternal outcome(মায়ের<br>অবস্থা)                                                                                                                                           | 1. Living (জীবিত )<br>2. Death during<br>labor/delivery<br>(প্রসবের সময় মারা<br>গেছে)<br>3. Death after<br>delivery<br>(প্রসবের পর মারা গেছে)                                                                                                                                                                                                                                                                           | _____                                                    | If 2 or 3,<br>go to 500.<br>(যদি ২ অথবা<br>৩ হয় তাহলে<br>৫০০ যেতে<br>হবে।)                                              |
| 306 | Complications during<br>labor/delivery?<br>(প্রসবের সময় কোন জটিলতা<br>ছিল?)                                                                                                 | 1. Yes- হ্যাঁ<br>2. No- না<br>9. Data missing<br>(তথ্য বাদ পড়েছে)                                                                                                                                                                                                                                                                                                                                                       | _____                                                    | If no, go to<br>310.<br>(যদি না হয়,<br>তবে ৩১০<br>যেতে হবে।)                                                            |
| 307 | What complications are<br>noted in the register?<br>Multiple answers<br>permitted as<br>applicable.<br>(রেজিস্টারে কি ধরনের জটিলতা<br>উল্লেখ আছে? একাধিক উত্তর<br>প্রযোজ্য।) | 1. Pre-eclampsia<br>(প্রি-একলাম্পসিয়া)<br>2. Eclampsia/convul<br>sions (একলাম্পশিয়া)<br>3. Heavy bleeding<br>during labor<br>(প্রসবের সময় অতিরিক্ত<br>রক্ত ক্ষরণ)<br>4. Heavy bleeding<br>after delivery<br>(প্রসবের পর অতিরিক্ত<br>রক্ত ক্ষরণ)<br>5. Prolonged<br>labor/insufficient<br>cervical<br>dilation(দীর্ঘায়িত<br>প্রসব ব্যথা/ )<br>6. Prolonged labor,<br>pushing more<br>than 2<br>hours(দীর্ঘায়িত প্রসব | _____ _____<br>_____ _____<br>_____ _____<br>_____ _____ | [If single digit, add 0<br>as first number. Ex:<br>Obstructed labor=07]<br><br>If need to specify:<br><br>_____<br>_____ |

বাংলাদেশ ম্যাটারনাল আউট কাম নিউটিশন ইনটারভেনশন ডাটা এবসটাকশন ফরম ভার্সন ১.০  
এফএইচআই ৩৬০ গবেষণা #৯৪৯৭৫৭  
পিএইচসি তে জমা দেবার তারিখঃ ২৭ অগাস্ট ২০১৬  
পরিমার্জিত : ২৭ অগাস্ট ২০১৬

|     |                                                                                                                 |                                                                                                                                                                                                                                                                                                                                                                                                           |                                |                                                                        |
|-----|-----------------------------------------------------------------------------------------------------------------|-----------------------------------------------------------------------------------------------------------------------------------------------------------------------------------------------------------------------------------------------------------------------------------------------------------------------------------------------------------------------------------------------------------|--------------------------------|------------------------------------------------------------------------|
|     |                                                                                                                 | <p>ব্যথা, ২ ঘন্টার অধিক সময় ধরেচেপ্টা)</p> <p>7. Obstructed labor (বার্ধা গ্রস্থ প্রসব)</p> <p>8. Breech/non-cephalic (বাচ্চার মাথা উপরের দিকে)</p> <p>9. Fever/infection in labor (প্রসবের সময় জ্বর/সংক্রামন)</p> <p>10. Baby not breathing well (বাচ্চা শ্বাস প্রশ্বাস ঠিকমত নিচ্ছে না)</p> <p>11. Retained placenta (গর্ভফুল আটকে যাওয়া)</p> <p>12. Other (specify): [অন্যান্য(নির্দিষ্ট করুন)]</p> |                                |                                                                        |
| 308 | <p>Was patient referred to hospital for complications?<br/>(এই জটিলতার সমূহের কারণে মা হাসপাতালে গিয়েছিল?)</p> | <p>1. Yes- হ্যাঁ</p> <p>2. No- না</p>                                                                                                                                                                                                                                                                                                                                                                     | _____                          |                                                                        |
| 309 | <p>Did the patient go to the hospital when referred?<br/>(রেফার্ড করার পর হাসপাতালে গিয়েছিলেন?)</p>            | <p>1. Yes- হ্যাঁ</p> <p>2. No- না</p> <p>[Ask for hospital certificate/record]</p>                                                                                                                                                                                                                                                                                                                        | _____                          |                                                                        |
| 310 | <p>Neonatal outcome<br/>(নবজাতকের অবস্থা)</p>                                                                   | <p>1. Stillbirth - macerated (গলিত মৃত প্রসব)</p> <p>2. Stillbirth – fresh(স্বাভাবিক মৃত প্রসব)</p> <p>3. Live born, preterm (before 9<sup>th</sup> month)<br/>[অপরিনত জীবিত জন্ম(৯ মাসের পূর্বে)]</p> <p>4. Live born, term (পরিনত জীবিত জন্ম)</p>                                                                                                                                                       | _____                          | <p>If 1 or 2, go to 314.<br/>(যদি ১ অথবা ২ হয়, তবে ৩১৪ যেতে হবে।)</p> |
| 311 | <p>If live born, weight of baby at birth<br/>(যদি জীবিত জন্ম হয়, বাচ্চার জন্ম ওজন)</p>                         | <p>Enter weight in grams; enter 9999 if missing.<br/>(গ্রামে ওজন লিখুন, বাদ পড়া তথ্যের জন্য ৯৯৯৯ লিখুন).</p>                                                                                                                                                                                                                                                                                             | <p>_____</p> <p>_____grams</p> |                                                                        |

বাংলাদেশ ম্যাটারনাল আউট কাম নিউটিশন ইনটারভেনশন ডাটা এবসটাকশন ফরম ভার্সন ১.০

এফএইচআই ৩৬০ গবেষণা #৯৪৯৭৫৭

পিএইচসি তে জমা দেবার তারিখঃ ২৭ অগাস্ট ২০১৬

পরিমার্জিত : ২৭ অগাস্ট ২০১৬

|     |                                                                                                           |                                                                                                                                                                         |                                                                            |                                                      |
|-----|-----------------------------------------------------------------------------------------------------------|-------------------------------------------------------------------------------------------------------------------------------------------------------------------------|----------------------------------------------------------------------------|------------------------------------------------------|
| 312 | Breastfeeding within 1 hour of delivery?<br>(প্রসবের ১ ঘন্টার মধ্যে বাচ্চাকে শাল দুধ খাওয়ানো হয়েছিল?)   | 1. Yes- হ্যাঁ<br>2. No- না<br>9. Data missing<br>(তথ্য বাদ পড়েছে)                                                                                                      | _____                                                                      |                                                      |
| 313 | Exclusively breastfeeding at first PNC visit?<br>(প্রথম পি এন সিতে শুধুমাত্র বুকের দুধ খাওয়ানো হয়েছিল?) | 1. Yes- হ্যাঁ<br>2. No- না<br>9. Data missing<br>(তথ্য বাদ পড়েছে)                                                                                                      | _____                                                                      |                                                      |
| 314 | Date first PNC visit<br>(প্রথম পি এন সি পরিদর্শনে তারিখ)                                                  | Day/month/year<br>Gregorian; for single digit month or day, write 0 first (ex: July=07). If missing, write 99/99/99<br>(দিন/মাস/। বাদ পড়া তথ্যের জন্য ৯৯/৯৯/৯৯ লিখুন ) | _____/_____/_____<br>_____/_____/_____<br>_____/_____/_____                |                                                      |
| 315 | Blood pressure at first PNC visit<br>(প্রথম পি এন সি পরিদর্শনে রক্ত চাপ?)                                 | To record double digit number, make first number 0; for example, 120/60 record as 120/060                                                                               | _____/_____/_____<br>_____/_____/_____<br>[Enter 999/999 for missing data] |                                                      |
| 316 | Hemoglobin number available for PNC visit?<br>(পি এন সি পরিদর্শনে হিমোগ্লোবিনের পরিমাণ লিখা হয়েছে কি না) | 1. Yes- হ্যাঁ<br>2. No- না                                                                                                                                              | _____                                                                      |                                                      |
| 317 | Hemoglobin at PNC visit<br>(পি এন সি পরিদর্শনে হিমোগ্লোবিনের পরিমাণ)                                      | In gm/dL, watch for decimal point                                                                                                                                       | _____._____                                                                |                                                      |
| 318 | Number PNC visits to date?<br>(এ পর্যন্ত পি এন সি পরিদর্শনের সংখ্যা)                                      | Add total number from register, including today's visit.<br>(মোট সংখ্যা আজকের দিন সহ রেজিস্টার থেকে লিখুন )                                                             | _____                                                                      |                                                      |
| 319 | Any complications during the postpartum period?<br>(প্রসবের পরবর্তী সময়ে কোন জটিলতা ছিল?)                | 1. Yes- হ্যাঁ<br>2. No- না                                                                                                                                              | _____                                                                      | If no, go to 400.<br>(যদি না হয়, তবে ৪০০ যেতে হবে।) |
| 320 | What postpartum complications are noted in the register/red book;                                         | 1. Pre-eclampsia<br>(প্রি-একলাম্পসিয়া)<br>2. Eclampsia/convulsions<br>(একলাম্পসিয়া)                                                                                   | _____                                                                      |                                                      |

বাংলাদেশ ম্যাটারনাল আউট কাম নিউটিশন ইনটারভেনশন ডাটা এবসটাকশন ফরম ভার্সন ১.০

এফএইচআই ৩৬০ গবেষণা #৯৪৯৭৫৭

পিএইচসি তে জমা দেবার তারিখঃ ২৭ অগাস্ট ২০১৬

পরিমার্জিত : ২৭ অগাস্ট ২০১৬

|     |                                                                                                                                           |                                                                                                                                                                                                                                                                                                                                                                                                        |                                                                                |                                                                |
|-----|-------------------------------------------------------------------------------------------------------------------------------------------|--------------------------------------------------------------------------------------------------------------------------------------------------------------------------------------------------------------------------------------------------------------------------------------------------------------------------------------------------------------------------------------------------------|--------------------------------------------------------------------------------|----------------------------------------------------------------|
|     | multiple answers permitted as applicable?<br>(প্রসব পরবর্তী সময়ে রেজিষ্টার/লাল বইয়ে কি ধরনের জটিলতা উল্লেখ ছিল? একাধিক উত্তর প্রযোজ্য,) | <p>3. Heavy bleeding after delivery<br/>(প্রসবের পর অতিরিক্ত রক্ত ক্ষরণ)</p> <p>4. Fever/infection<br/>(জ্বর/সংক্রামন)</p> <p>5. Baby not breathing well<br/>(বাচ্চা সঠিকভাবে শ্বাস-প্রশ্বাস নিচ্ছে না)</p> <p>6. Baby not nursing well<br/>(বাচ্চার সঠিক যত্ন হয় নাই)</p> <p>7. No milk production</p> <p>8. (মায়ের দুধ তৈরী হচ্ছে না)</p> <p>9. Other (specify):<br/>অন্যান্য (নির্দিষ্ট করুন)</p> | <p>_____</p> <p>_____</p> <p>If need to specify:</p> <p>_____</p> <p>_____</p> |                                                                |
| 321 | Was patient referred to hospital for postpartum complications?<br>(প্রসব পরবর্তী এই জটিলতার জন্য হাসপাতালে রেফার্ড করা হয়েছে?)           | <p>1. Yes- হ্যাঁ</p> <p>2. No- না</p>                                                                                                                                                                                                                                                                                                                                                                  | _____                                                                          |                                                                |
| 322 | Did the patient go to the hospital when referred?<br>(রেফার্ড করার পর হাসপাতালে গিয়েছিল?)                                                | <p>1. Yes- হ্যাঁ</p> <p>2. No- না</p>                                                                                                                                                                                                                                                                                                                                                                  | _____                                                                          |                                                                |
| 323 | Selected /plans to use family planning method?<br>(পরিবার পরিকল্পনা পদ্ধতি গ্রহণের পরিকল্পনা করেছে?)                                      | <p>1. Yes- হ্যাঁ</p> <p>2. No- না</p> <p>9. Data missing<br/>(তথ্য বাদ পড়েছে)</p>                                                                                                                                                                                                                                                                                                                     | _____                                                                          |                                                                |
| 324 | Status of infant at PNC visit<br>(পি এন সি পরিদর্শনে শিশুর অবস্থা)                                                                        | <p>1. Alive and well<br/>(জীবিত এবং সুস্থ্য)</p> <p>2. Alive and sick<br/>(জীবিত এবং অসুস্থ্য)</p> <p>3. Death within 48 hours birth<br/>(জন্মের ৪৮ ঘন্টার মধ্যে মৃত্যু )</p>                                                                                                                                                                                                                          | _____                                                                          | If 1 or 2, go to 400.<br>(যদি ১ অথবা ২ হয়, তবে ৪০০ যেতে হবে।) |

বাংলাদেশ ম্যাট্রনাল আউট কাম নিউটিশন ইনটারভেনশন ডাটা এবসটাকশন ফরম ভার্সন ১.০  
এফএইচআই ৩৬০ গবেষণা #৯৪৯৭৫৭  
পিএইচসি তে জমা দেবার তারিখঃ ২৭ অগাস্ট ২০১৬  
পরিমার্জিত : ২৭ অগাস্ট ২০১৬



|                                                                                                                                                                                    |                                                                                                                                                                                             |                                                                                                                                                                                                                                                                           |                             |                                                                  |
|------------------------------------------------------------------------------------------------------------------------------------------------------------------------------------|---------------------------------------------------------------------------------------------------------------------------------------------------------------------------------------------|---------------------------------------------------------------------------------------------------------------------------------------------------------------------------------------------------------------------------------------------------------------------------|-----------------------------|------------------------------------------------------------------|
|                                                                                                                                                                                    |                                                                                                                                                                                             | 4. Death between 48 hours of birth and PNC visit<br>(জন্মের ৪৮ ঘন্টা পর মৃত্যু এবং পি এন সি পরিদর্শন)                                                                                                                                                                     |                             |                                                                  |
| 325                                                                                                                                                                                | Cause of infant death [Consult verbal autopsy form if available; multiple answers permitted as applicable]<br>(শিশু মৃত্যুর কারণ। ভারভাল অটোপসি রিপোর্ট যদি থাকে, একাধিক উত্তর গ্রহণযোগ্য।) | 1. Birth asphyxia (জন্ম গত শ্বাস কষ্ট)<br>2. Sepsis/infection from labor(পচন/সংক্রামক)<br>3. Cord infection (শ্বাস তন্ত্রের সংক্রামন)<br>4. Prematurity (অপরিণত)<br>5. Dehydration (পানি শূন্যতা)<br>6. Other (specify): অন্যান্য ( নির্দিষ্ট করুন)<br>7. Unknown (অজানা) | _____<br>_____<br>_____     |                                                                  |
| 326                                                                                                                                                                                | Date of infant death<br>(শিশু মৃত্যুর কারণ)                                                                                                                                                 | Day/month/year Gregorian; for single digit month or day, write 0 first (ex: July=07). If missing, write 99/99/99<br>(দিন/মাস/বছর। বাদ পড়া তথ্যের জন্য ৯৯/৯৯/৯৯ লিখুন)                                                                                                    | ____/____/____<br>____/____ |                                                                  |
| Nutrition Indicators- পুষ্টির নির্দেশক                                                                                                                                             |                                                                                                                                                                                             |                                                                                                                                                                                                                                                                           |                             |                                                                  |
| 400                                                                                                                                                                                | Number IFA tablets reported consumed at last recorded PNC entry(শেষ পি এন সি ভিজিটে কতটি আয়রন বডি খেয়েছে খেয়েছে বলে উলে-খ রয়েছে?)                                                       | Enter total from register; enter 99 for missing data                                                                                                                                                                                                                      | ____                        |                                                                  |
| 401                                                                                                                                                                                | Number calcium tablets reported consumed at last recorded PNC entry (শেষ পি এন সি তথ্য লিপিবদ্ধে কতটা ক্যালসিয়াম বডি খেয়েছে খেয়েছে বলে উলে-খ রয়েছে?)                                    | Enter total from register; enter 99 for missing data                                                                                                                                                                                                                      | ____                        | If control area or visit before 45 days for Intervention, FINISH |
| For Intervention Participants At 45 Day PNC Visit Only: Record responses for below questions from today's PNC visit (শুধুমাত্র ইন্টারভেনশন এরিয়ায় ৪৫ দিনের পি এন সি মায়ের জন্য) |                                                                                                                                                                                             |                                                                                                                                                                                                                                                                           |                             |                                                                  |
| 402                                                                                                                                                                                | Fish/ Meat/Liver taken within last 24 hours                                                                                                                                                 | 1. Yes- হ্যাঁ<br>2. No- না                                                                                                                                                                                                                                                | _____                       | If no/ missing,                                                  |

বাংলাদেশ ম্যাট্রনাল আউট কাম নিউটিশন ইন্টারভেনশন ডাটা এবসটাকশন ফরম ভার্সন ১.০

এফএইচআই ৩৬০ গবেষণা #৯৪৯৭৫৭

পিএইচসি তে জমা দেবার তারিখঃ ২৭ অগাস্ট ২০১৬

পরিমার্জিত : ২৭ অগাস্ট ২০১৬

|     |                                                                                                          |                                                                                                              |       |                                                                           |
|-----|----------------------------------------------------------------------------------------------------------|--------------------------------------------------------------------------------------------------------------|-------|---------------------------------------------------------------------------|
|     | (গত ২৪ ঘন্টায় মাছ/ মাংস/ কলিজা খেয়েছেন?)                                                               | 9. Data missing<br>(তথ্য বাদ পড়েছে)                                                                         |       | go to 404.(যদি না হয়/বাদ পড়া তথ্যের জন্য ৪০৪ যেতে হবে।)                 |
| 403 | Amount (bowl)<br>[পরিমাণ(বাটিতে)]                                                                        | Enter stated number of bowl(s), or 99 for missing data<br>(পরিমাণ বোলে লিখুন, বাধ পড়া তথ্যের জন্য ৯৯ লিখুন) | _____ |                                                                           |
| 404 | Egg taken within 24 hours<br>(গত ২৪ ঘন্টায় ডিম খেয়েছেন?)                                               | 1. Yes- হ্যাঁ<br>2. No- না<br>9. Data missing<br>(তথ্য বাদ পড়েছে)                                           | _____ | If no/ missing, go to 406.(যদি না হয়/বাদ পড়া তথ্যের জন্য ৪০৬ যেতে হবে।) |
| 405 | Amount<br>[পরিমাণ]                                                                                       | Enter stated number of bowl(s), or 99 for missing data<br>(পরিমাণ লিখুন, বাদ পড়া তথ্যের জন্য ৯৯ লিখুন)      | _____ |                                                                           |
| 406 | Milk /Milk Products taken within last 24 hours<br>(গত ২৪ ঘন্টায় দুধ/দুধের তৈরী খাবার খেয়েছেন?)         | 1. Yes- হ্যাঁ<br>2. No- না<br>9. Data missing<br>(তথ্য বাদ পড়েছে)                                           | _____ | If no/ missing, go to 408.(যদি না হয়/বাদ পড়া তথ্যের জন্য ৪০৮ যেতে হবে।) |
| 407 | Amount (bowl)<br>[পরিমাণ(বাটিতে)]                                                                        | Enter stated number of bowl(s), or 99 for missing data<br>(পরিমাণ বোলে লিখুন, বাধ পড়া তথ্যের জন্য ৯৯ লিখুন) | _____ |                                                                           |
| 408 | Orange/yellow vegetable/fruit taken within last 24 hours<br>(গত ২৪ ঘন্টায় কমলা/হলুদ সজ্জি/ফল খেয়েছেন?) | 1. Yes- হ্যাঁ<br>2. No- না<br>9. Data missing<br>(তথ্য বাদ পড়েছে)                                           | _____ | If no/ missing, go to 410.(যদি না হয়/বাদ পড়া তথ্যের জন্য                |

বাংলাদেশ ম্যাটারনাল আউট কাম নিউটিশন ইনটারভেনশন ডাটা এবসটাকশন ফরম ভার্সন ১.০  
এফএইচআই ৩৬০ গবেষণা #৯৪৯৭৫৭  
পিএইচসি তে জমা দেবার তারিখঃ ২৭ অগাস্ট ২০১৬  
পরিমার্জিত : ২৭ অগাস্ট ২০১৬

|     |                                                                                                                          |                                                                                                              |       |                                                                           |
|-----|--------------------------------------------------------------------------------------------------------------------------|--------------------------------------------------------------------------------------------------------------|-------|---------------------------------------------------------------------------|
|     |                                                                                                                          |                                                                                                              |       | ৪১০ যেতে হবে।)                                                            |
| 409 | Amount (bowl)<br>[পরিমান(বাটিতে)]                                                                                        | Enter stated number of bowl(s), or 99 for missing data<br>(পরিমান বোলে লিখুন, বাধ পড়া তথ্যের জন্য ৯৯ লিখুন) | _____ |                                                                           |
| 410 | Rice/ Bread taken within last 24 hours<br>(গত ২৪ ঘন্টায় ভাত/রুটি খেয়েছেন?)                                             | 1. Yes- হ্যাঁ<br>2. No- না<br>9. Data missing<br>(তথ্য বাদ পড়েছে)                                           | _____ | If no/ missing, go to 412.(যদি না হয়/বাদ পড়া তথ্যের জন্য ৪১২ যেতে হবে।) |
| 411 | Amount (bowl)<br>[পরিমান(বাটিতে)]                                                                                        | Enter stated number of bowl(s), or 99 for missing data<br>(পরিমান বোলে লিখুন, বাধ পড়া তথ্যের জন্য ৯৯ লিখুন) | _____ |                                                                           |
| 412 | Dark Green Vegetables taken within last 24 hours<br>(গত ২৪ ঘন্টায় গাঢ় সবুজ শাক সবজি খেয়েছেন?)                         | 1. Yes- হ্যাঁ<br>2. No- না<br>9. Data missing<br>(তথ্য বাদ পড়েছে)                                           | _____ | If no/ missing, go to 414 (যদি না হয়/বাদ পড়া তথ্যের জন্য ৪১৪ যেতে হবে।) |
| 413 | Amount (bowl)<br>[পরিমান(বাটিতে)]                                                                                        | Enter stated number of bowl(s), or 99 for missing data<br>(পরিমান বোলে লিখুন, বাধ পড়া তথ্যের জন্য ৯৯ লিখুন) | _____ |                                                                           |
| 414 | Thick Lentils taken within last 24 hours<br>(গত ২৪ ঘন্টায় ঘন ডাল খেয়েছেন?)<br>Thick Lentils taken within last 24 hours | 1. Yes- হ্যাঁ<br>2.No- না<br>9. Data missing<br>(তথ্য বাদ পড়েছে)                                            | _____ | If no, FINISH and go to participant interview.                            |
| 415 | Amount (bowl)<br>[পরিমান(বাটিতে)]                                                                                        | Enter stated number of bowl(s), or 99 for missing data<br>(পরিমান বোলে লিখুন, বাধ পড়া তথ্যের জন্য ৯৯ লিখুন) | _____ | FINISH and go to participant interview.                                   |

বাংলাদেশ ম্যাটারনাল আউট কাম নিউটিশন ইনটারভেনশন ডাটা এবসটাকশন ফরম ভার্সন ১.০

এফএইচআই ৩৬০ গবেষণা #৯৪৯৭৫৭

পিএইচসি তে জমা দেবার তারিখঃ ২৭ অগাস্ট ২০১৬

পরিমার্জিত : ২৭ অগাস্ট ২০১৬

| Maternal Death Information – Complete only if 305 = 2 or 3. মাতৃ মৃত্যুর তথ্য |                                                                                                                                                                                                                                                                                   |                                                                                                                                                                                                                                                                                                                                         |                                                                  |
|-------------------------------------------------------------------------------|-----------------------------------------------------------------------------------------------------------------------------------------------------------------------------------------------------------------------------------------------------------------------------------|-----------------------------------------------------------------------------------------------------------------------------------------------------------------------------------------------------------------------------------------------------------------------------------------------------------------------------------------|------------------------------------------------------------------|
| 500                                                                           | Date of maternal death<br>(মাতৃ মৃত্যুর তারিখ)                                                                                                                                                                                                                                    | Day/month/year<br>Gregorian; for single digit<br>month or day, write 0<br>first (ex: July=07). If<br>missing, write 99/99/99<br>(দিন/ মাস/বছর। বাদ পড়া<br>তথ্যেও জন্য ৯৯/৯৯/৯৯ লিখুন)                                                                                                                                                  | ____/____/____<br>____/____                                      |
| 501                                                                           | Site of maternal death<br>(মাতৃ মৃত্যুর স্থান)                                                                                                                                                                                                                                    | 1. Patient's home<br>(নিজের বাড়ী)<br>2. Mother's home<br>(মায়ের বাড়ী)<br>3. En route to<br>facility<br>(সেবা গ্রহণের পথে)<br>4. At hospital<br>(হাসপাতালে)<br>9. Data missing<br>(তথ্য বাদ পড়েছে)                                                                                                                                   | _____                                                            |
| 502                                                                           | Cause of maternal<br>death (take from SK<br>register and confirm<br>with verbal autopsy<br>form; multiple answers<br>permitted as<br>applicable)<br>(মাতৃ মৃত্যুর কারণ (স্বাস্থ্য কর্মীর<br>রেজিস্টার এবং মৌখিক অটোপসি<br>রিপোর্ট থেকে তথ্য নিতে হবে,<br>একাধিক তথ্য গ্রহণযোগ্য ) | 1. Hemorrhage before<br>delivery<br>(প্রসবের পর্বে রক্ত ক্ষরণ)<br>2. Hemorrhage after<br>delivery<br>(প্রসবের পর রক্ত ক্ষরণ)<br>3. Uterine rupture<br>(জরায়ু ফেটে যাওয়া)<br>4. Pre-<br>eclampsia/eclampsia<br>(প্রাথমিক খিচুনী/ খিচুনী)<br>5. Sepsis/infection<br>(পচন/সংক্রামন)<br>6. Other (specify):<br>[অন্যান্য(নির্দিষ্ট করুন)] | _____<br>_____<br>_____<br>If need to specify:<br>_____<br>_____ |
| 503                                                                           | Neonatal outcome<br>(নবজাতকের অবস্থা)                                                                                                                                                                                                                                             | 1. Stillbirth -<br>macerated<br>(গলিত মৃত জন্ম)<br>2. Stillbirth – fresh<br>(স্বাভাবিক মৃত প্রসব)<br>3. Live born,<br>preterm<br>(অপরিনত জীতি জন্ম)<br>4. Live born, term<br>(পরিনত জীবিত জন্ম)                                                                                                                                         | _____                                                            |

বাংলাদেশ ম্যাটারনাল আউট কাম নিউটিশন ইনটারভেনশন ডাটা এবসটাকশন ফরম ভার্সন ১.০  
এফএইচআই ৩৬০ গবেষণা #৯৪৯৭৫৭  
পিএইচসি তে জমা দেবার তারিখঃ ২৭ অগাস্ট ২০১৬  
পরিমার্জিত : ২৭ অগাস্ট ২০১৬

RECENTLY DELIVERED WOMEN (Within 42-60 days of delivery) INTERVIEW FORM

(৪২-৬০ দিনের প্রসূতি মায়াদের সাক্ষাৎকার ফরম)

Instructions: Please accompany the SK to the recently delivered woman home for the planned PNC visit. Please have the SK introduce you and then ask the patient and her family if she would be willing to speak with you briefly and answer some questions about her medical history and pregnancy and birth experiences. If she agrees, please proceed with informed consent and then administer the following questionnaire – both of these activities should be done with just the woman present.

ভূমিকাঃ দয়া করে এসকের সাথে তার শিডিউল পি এ্যান সি ভিজিট এ প্রসূতি মায়ের বাড়িতে যান। এসকে কে বলুন আপনাকে প্রসূতির পরিবারের সাথে পরিচয় করিয়ে দিতে এবং আপনি প্রসূতির গর্ভকালীন, প্রসব কালীন এবং প্রসব পরবর্তী সময়ে কোন সমস্যা থেকে থাকলে তা যানতে চাবার জন্য অনুমতি নিন। যদি সে রাজি থাকে তাহলে, প্রথমে তার সম্মতি পত্র নিন তারপর নিম্নে লিখিত প্রশ্ন গুলো করুন।

| No.                                              | Question                                                                                                           | Response Options                                                                                                                                                             | Response      | Skip Pattern/Notes |
|--------------------------------------------------|--------------------------------------------------------------------------------------------------------------------|------------------------------------------------------------------------------------------------------------------------------------------------------------------------------|---------------|--------------------|
| 001                                              | District Name(জেলার নাম)                                                                                           | 1. Mymensingh (ময়মনসিংহ)<br>2. Rangpur(রংপুর)<br>3. Lalmonirhat (লালমনিরহাট)<br>4. Kurigram(কুড়িগ্রাম)                                                                     | _____         |                    |
| 002                                              | Upazila Name(উপজেলার নাম)                                                                                          |                                                                                                                                                                              | _____         |                    |
| 003                                              | Upazila Condition(উপজেলার ধরন)                                                                                     | 1. Intervention (ইন্টারভেনশন)<br>2. Control(কন্ট্রোল)                                                                                                                        | _____         |                    |
| 004                                              | Data Collector Name (তথ্য সংগ্রহকারীর নাম)                                                                         |                                                                                                                                                                              | _____         |                    |
| 005                                              | Participant ID Number(তথ্য প্রদানকারীর আইডি নম্বর)                                                                 |                                                                                                                                                                              | _____         |                    |
| 006                                              | Maternal Height Measurement (মায়ের উচ্চতার পরিমাপ)                                                                | Measure height using wall or door and record in meters (ঘরের দেয়াল অথবা দরজা ব্যবহার করে উচ্চতা পরিমাপ করুন এবং মিটারে রেকর্ড করুন)                                         | _____ . _____ |                    |
| <b>Household SES (খানার আর্থ-সামাজিক অবস্থা)</b> |                                                                                                                    |                                                                                                                                                                              |               |                    |
| 100                                              | What is the main source of drinking water for members of your household?(আপনার পরিবারের খাবার পানির প্রধান উৎস কি) | 1. Own tube well (নিজস্ব টিউবওয়েল)<br>2. Others' tube well(অন্যের টিউবওয়েল)<br>3. Community tube well(সামাজিক টিউবওয়েল)<br>4. Supply water (piped) (পাইপে সরবরাহকৃত পানি) | _____         |                    |

বাংলাদেশ ম্যাটারনাল আউট কাম নিউটিশন ইন্টারভেনশন সাক্ষাৎকার ফরম ভার্সন ১.০

এফএইচআই ৩৬০ গবেষণা #৯৪৯৭৫৭

পিএইচসি তে জমা দেবার তারিখঃ ২৭ অগাস্ট ২০১৬

পরিমার্জিত : ২৭ অগাস্ট ২০১৬

|     |                                                                                                                                                                                                                           |                                                                                                                                                                                                                                                                                                                                                           |                                                                |  |
|-----|---------------------------------------------------------------------------------------------------------------------------------------------------------------------------------------------------------------------------|-----------------------------------------------------------------------------------------------------------------------------------------------------------------------------------------------------------------------------------------------------------------------------------------------------------------------------------------------------------|----------------------------------------------------------------|--|
|     |                                                                                                                                                                                                                           | <p>5. Ring well/indara(রিংকুয়া/ইন্দারা)</p> <p>6. Pond(পুকুর)</p> <p>7. River/canal/নদী/খাল)</p> <p>8. Other(specify)<br/>(অন্যান্য নির্দিষ্ট করুন):</p>                                                                                                                                                                                                 |                                                                |  |
| 101 | How long does it take to go fetch water from the source and return to the home? (ব্যবহারকৃত উৎস হতে পানি সংগ্রহ করে বাড়ীতে ফেরত আসতে কতক্ষন সময় ব্যয় হয়/লাগে)                                                         | [#minutes] [মিনিট]                                                                                                                                                                                                                                                                                                                                        | _____                                                          |  |
| 102 | Who usually goes to this source to fetch water for the household? (আপনার পরিবার থেকে কে সাধারণত পানি আনতে যায়)                                                                                                           | <p>1. Adult female<br/>(পূর্ণ বয়স্ক মহিলা)</p> <p>2. Adult male<br/>(পূর্ণ বয়স্ক পুরুষ)</p> <p>3. Female child&lt;15 years of age<br/>(১৫ বছরের কম বয়সী মেয়ে)</p> <p>4. Male child (&lt;15 years)<br/>(১৫ বছরের কমবয়সী ছেলে)</p> <p>5. No specified person<br/>(নির্দিষ্ট ব্যক্তি নয়)</p> <p>6. Other (specify)অন্যান্য<br/>(নির্দিষ্ট করুন)</p>    | <p>_____</p> <p>Specify:<br/>(নির্দিষ্ট করুন)</p> <p>_____</p> |  |
| 103 | What is the main source of water in your household for: (আপনার খানার সদস্যরা নিম্নলিখিত কাজের জন্যকোন পানির উৎসের উপর নির্ভরশীল?)<br>a. Cooking? (রান্নার জন্য)<br>b. Bathing? (গোসলের জন্য)<br>c. Washing? (ধোয়ার জন্য) | <p>1. Own tube well (নিজস্ব টিউবওয়েল)</p> <p>2. Others' tube well (অন্যের টিউবওয়েল)</p> <p>3. Community tube well (যৌথ টিউবওয়েল)</p> <p>4. Supply water (piped) (পাইপে সরবারহকৃত পানি)</p> <p>5. Ring well/indara (রিং-কুয়া/ইন্দারা)</p> <p>6. Pond(পুকুর)</p> <p>7. River/canal(নদ/খাল)</p> <p>8. Other (specify):<br/>অন্যান্য(নির্দিষ্ট করুন):</p> | <p>a. _____</p> <p>b. _____</p> <p>c. _____</p>                |  |
| 104 | What kind of toilet facility do members of your household usually use?                                                                                                                                                    | 1. Sanitary with flush (water sealed)                                                                                                                                                                                                                                                                                                                     | _____                                                          |  |

বাংলাদেশ ম্যাটারনাল আউট কাম নিউটিশন ইন্টারভেনশন সাক্ষাৎকার ফরম ভার্সন ১.০

এফএইচআই ৩৬০ গবেষণা #৯৪৯৭৫৭

পিএইচসি তে জমা দেবার তারিখঃ ২৭ অগাস্ট ২০১৬

পরিমার্জিত ঃ ২৭ অগাস্ট ২০১৬

|     |                                                                                                                                                                                                                                      |                                                                                                                                                                                                                                                                                                                                                               |                                     |                                            |
|-----|--------------------------------------------------------------------------------------------------------------------------------------------------------------------------------------------------------------------------------------|---------------------------------------------------------------------------------------------------------------------------------------------------------------------------------------------------------------------------------------------------------------------------------------------------------------------------------------------------------------|-------------------------------------|--------------------------------------------|
|     | (আপনার খানার সদস্যরা সাধারণত কোন ধরনের পায়খানা ব্যবহার করে?)                                                                                                                                                                        | (ফ্লাসযুক্ত স্যানিটারী টয়লেট (ওয়াটার সীল)<br>2. Sanitary without flush (water sealed) [ফ্লাসবিহীন স্যানিটারী টয়লেট (ওয়াটার সীল)]<br>3. Pucca/pit without water seal [পাকা/পিট ল্যাট্রিন (ওয়াটার সীল ছাড়া)]<br>4. Kutcha/hanging (fixed place) (কাঁচা/ঝুরন্ত (নির্দিষ্ট করুন)<br>5. Open field (খোলা মাঠ)<br>6. Other(specify) অন্যান্য (নির্দিষ্ট করুন) | Specify:<br>(নির্দিষ্টকরণ)<br>_____ |                                            |
| 105 | Do you share this toilet facility with other households?<br>(আপনি কি আপনার পায়খানা অন্য কোন পরিবারের সাথে যৌথ ভাবে ব্যবহার করেন?)                                                                                                   | 1. Yes(হ্যাঁ)<br>2. No(না)                                                                                                                                                                                                                                                                                                                                    | _____                               |                                            |
| 106 | Do you own the house that you live in? /আপনি আপনার নিজের বাড়ীতে বসবাস করেন?                                                                                                                                                         | 1. Yes(হ্যাঁ)<br>2. No(না)                                                                                                                                                                                                                                                                                                                                    | _____                               |                                            |
| 107 | Does any member of this household own agricultural land?<br>(আপনার খানার কোন সদস্যের চাষাবাদের জমির /আবাদি জমির মালিকানা রয়েছে কি?)                                                                                                 | 1. Yes(হ্যাঁ)<br>2. No (না)                                                                                                                                                                                                                                                                                                                                   | _____                               | If no, go to 109/যদি না তাহলে ১০৯ যেতে হবে |
| 108 | How many decimals of agricultural land do members of this household own? (Add total amount reported by all adult members of household)<br>(আপনার খানার সদস্যরা সর্বমোট কত শতাংশ আবাদী জমির মালিক (পূর্ণ বয়স্ক সকল সদস্যের মালিকানা) | [If don't know, enter 999]/<br>(জানা না থাকলে ৯৯৯ লিখুন)                                                                                                                                                                                                                                                                                                      | _____                               |                                            |
| 109 | Do you have a garden or trees where you grow vegetables and/or fruit, or a pond where you fish?<br>(আপনার কি কোন বাগান/ফলের গাছ বা পুকুর আছে যেখানে সবজি, ফল বা মাছ চাষ করা হয়?)                                                    | 1. Yes (হ্যাঁ)<br>2. No(না)                                                                                                                                                                                                                                                                                                                                   | _____                               |                                            |

|     |                                                                                                                        |                                                                                                                                                                                                                                                                                             |   |                                                   |
|-----|------------------------------------------------------------------------------------------------------------------------|---------------------------------------------------------------------------------------------------------------------------------------------------------------------------------------------------------------------------------------------------------------------------------------------|---|---------------------------------------------------|
| 110 | Does your household have electricity? (আপনার বাড়ীতে কি বিদ্যুৎ আছে?)                                                  | 1. Yes(হ্যাঁ)<br>2. No(না)                                                                                                                                                                                                                                                                  | — | If yes, go to 113 (যদি না হয় তাহলে ১১৩ যেতে হবে) |
| 111 | Do you have any other kind of electric power? (আপনার কি অন্য কোন ধরনের বৈদ্যুতিক শক্তি আছে?)                           | 1. Yes (হ্যাঁ )<br>2. No (না )                                                                                                                                                                                                                                                              | — | If no, go to 113(যদি না হয় তাহলে ১১৩ যেতে হবে)   |
| 112 | If yes, what type? (যদি হ্যাঁ হয় তাহলে কোন ধরনের?)                                                                    | 1. Generator (জেনারেটর)<br>2. Solar (সোলার)<br>3. Other (specify)অন্যান্য (নির্দিষ্ট করণ)                                                                                                                                                                                                   | — |                                                   |
| 113 | What type of fuel does your household use for cooking? (আপনার বাড়ীতে রান্নার জন্য কি ধরনের জ্বালানী ব্যবহার করা হয়?) | 1. Electricity (বিদ্যুৎ)<br>2. LPG (এলপিগ্যাস)<br>3. Natural gas (প্রাকৃতিক গ্যাস)<br>4. Biogas (বায়ো গ্যাস)<br>5. Kerosene(কেরোসিন)<br>6. Charcoal (কাঠের কয়লা)<br>7. Wood/straw/leaves (কাঠ/খর/পাতা)<br>8. Animal dung (পশু পাখির বিষ্ঠা)<br>9. Other (specify)অন্যান্য (নির্দিষ্ট করণ) | — |                                                   |
| 114 | Main floor material (মেঝের প্রধান উপকরণ কি?)                                                                           | 1. Concrete(কংক্রিট)<br>2. Brick/cement (ইট/সিমেন্ট)<br>3. Tin/ CI sheet (টিন/সি আই সীট)<br>4. Dirt(মাটি)<br>5. Other (specify): অন্যান্য (নির্দিষ্ট করণ)                                                                                                                                   | — |                                                   |
| 115 | Main exterior wall material (বাহিরের দেয়ালের প্রধান উপকরণ কি?)                                                        | 1. Brick/cement (ইট/সিমেন্ট)<br>2. Wood(কাঠ)<br>3. Smoothed mud (মাটি)<br>4. Tile (টালি)<br>5. Tin (টিন)<br>6. Other (specify): অন্যান্য (নির্দিষ্ট করণ)                                                                                                                                    | — |                                                   |
| 116 | Main roof material (ছাদের প্রধান উপকরণ কি?)                                                                            | 1. Brick/cement (ইট/সিমেন্ট)<br>2. Jute stick (পাট কাঠি)<br>3. Bamboo/grass/stra                                                                                                                                                                                                            | — |                                                   |

বাংলাদেশ ম্যাটারনাল আউট কাম নিউটিশন ইনটারভেনশন সাক্ষাৎকার ফরম ভার্সন ১.০

এফএইচআই ৩৬০ গবেষণা #৯৪৯৭৫৭

পিএইচসি তে জমা দেবার তারিখঃ ২৭ অগাস্ট ২০১৬

পরিমার্জিত : ২৭ অগাস্ট ২০১৬



|     |                                                                                                                                                                                                                              | (বাঁশ/ঘাস/খড়)<br>4. Tin ( টিন)<br>5. Other<br>(specify):/অন্যান্য<br>(নির্দিষ্ট করণ) |                                                                                                                                                                                                              |  |
|-----|------------------------------------------------------------------------------------------------------------------------------------------------------------------------------------------------------------------------------|---------------------------------------------------------------------------------------|--------------------------------------------------------------------------------------------------------------------------------------------------------------------------------------------------------------|--|
|     | Household Assets: For the following items, please ask how many functional items of each type are present in the household and who owns them:<br>(খানার সম্পদের পরিমাণ: নিম্নলিখিত কার্যকরী উপকরণ সমূহের জন্য জিজ্ঞাসা করুন?) | How many are present in household? (insert number) (কতগুলো কার্যকরী উপকরণ রয়েছে?)    | ১. Who owns this/these items<br>সেগুলোর মালিকানা কার?<br>২. You<br>/আপনার নিজের<br>Your husband/<br>আপনার স্বামীর<br>৩. Jointly owned<br>/যৌথ মালিকানা<br>৪. Someone else in household/<br>পরিবারের অন্যকারো |  |
| 117 | 1.Stove/gas burner<br>(স্টোভ/গ্যাস বার্নার)                                                                                                                                                                                  | ক.-----                                                                               | খ.-----                                                                                                                                                                                                      |  |
| 118 | Bed/khat/chowki (খাট/চকি)                                                                                                                                                                                                    | ক.-----                                                                               | খ.-----                                                                                                                                                                                                      |  |
| 119 | Table/chair (টেবিল/চেয়ার)                                                                                                                                                                                                   | ক.-----                                                                               | খ.-----                                                                                                                                                                                                      |  |
| 120 | Electric fan (ceiling or floor/tumble) (বৈদ্যুতিক পাখাঃ সিলিং/মেঝে/টেবিল)                                                                                                                                                    | ক.-----                                                                               | খ.-----                                                                                                                                                                                                      |  |
| 121 | Table lamp (টেবিল ল্যাম্প)                                                                                                                                                                                                   | ক.-----                                                                               | খ.-----                                                                                                                                                                                                      |  |
| 122 | Radio(রেডিও)                                                                                                                                                                                                                 | ক.-----                                                                               | খ.-----                                                                                                                                                                                                      |  |
| 123 | Television/টেলিভিশন)                                                                                                                                                                                                         | ক.-----                                                                               | খ.-----                                                                                                                                                                                                      |  |
| 124 | Refrigerator (রেফ্রিজারেটর)                                                                                                                                                                                                  | ক.-----                                                                               | খ.-----                                                                                                                                                                                                      |  |
| 125 | Microwave oven<br>(মাইক্রোওয়েভ ওভেন)                                                                                                                                                                                        | ক.-----                                                                               | খ.-----                                                                                                                                                                                                      |  |
| 126 | Sewing machine/সেলাই মেশিন                                                                                                                                                                                                   | ক.-----                                                                               | খ.-----                                                                                                                                                                                                      |  |
| 127 | Bicycle/rickshaw(বাইসাইকেল/রিক্সা)                                                                                                                                                                                           | ক.-----                                                                               | খ.-----                                                                                                                                                                                                      |  |
| 128 | Motorcycle(মটরসাইকেল)                                                                                                                                                                                                        | ক.-----                                                                               | খ.-----                                                                                                                                                                                                      |  |

বাংলাদেশ ম্যাটারনাল আউট কাম নিউটিশন ইন্টারভেনশন সাক্ষাৎকার ফরম ভার্সন ১.০

এফএইচআই ৩৬০ গবেষণা #৯৪৯৭৫৭

পিএইচসি তে জমা দেবার তারিখঃ ২৭ অগাস্ট ২০১৬

পরিমার্জিত : ২৭ অগাস্ট ২০১৬

|                                                                                                                                                                             |                                                                                                                                                                                                                  |                                                                                                          |         |  |
|-----------------------------------------------------------------------------------------------------------------------------------------------------------------------------|------------------------------------------------------------------------------------------------------------------------------------------------------------------------------------------------------------------|----------------------------------------------------------------------------------------------------------|---------|--|
| 129                                                                                                                                                                         | Car(গাড়ী)                                                                                                                                                                                                       | ক.-----                                                                                                  | খ.----- |  |
| 130                                                                                                                                                                         | Mobile phone (মোবাইল ফোন)                                                                                                                                                                                        | ক.-----                                                                                                  | খ.----- |  |
| 131                                                                                                                                                                         | Cow/ buffalo (গরু/মহিষ)                                                                                                                                                                                          | ক.-----                                                                                                  | খ.----- |  |
| 132                                                                                                                                                                         | Goat/ sheep (ছাগল/ভেড়া)                                                                                                                                                                                         | ক.-----                                                                                                  | খ.----- |  |
| 133                                                                                                                                                                         | Chicken/duck (মুরগী/হাঁস)                                                                                                                                                                                        | ক.-----                                                                                                  | খ.----- |  |
| Exposure to SK and SS Home Visits – Validation (can be checked against register/red book entries) স্বাস্থ্যকর্মীর বাড়ী পরিদর্শনের তথ্য - যাচাই করুন ( রেজি: ও লাল বই দেখে) |                                                                                                                                                                                                                  |                                                                                                          |         |  |
| 200                                                                                                                                                                         | Were you visited by the SK during the 7-8 th month of your pregnancy period?<br>(আপনার গর্ভাবস্থায় ৭ম থেকে ৮ম মাসের সময় স্বাস্থ্যকর্মী পরিদর্শন করেছিলেন?)                                                     | 1. Yes(হ্যাঁ)<br>2. No(না)                                                                               | ---     |  |
| 201                                                                                                                                                                         | How many times did the SK visit you during the 7-8th month of your pregnancy period? (আপনার গর্ভাবস্থায় ৭ম থেকে ৮ম মাসের সময় স্বাস্থ্যকর্মী কতবার পরিদর্শন করেছিলেন কি ?)                                      | [# visits during 7-8 <sup>th</sup> month pregnancy]<br>(পরিদর্শনের নম্বর)                                | ---     |  |
| 202                                                                                                                                                                         | After giving birth to your new baby, how old was he/she when the SK first visited you after the delivery?<br>(সন্তান প্রসব করার পর প্রথম যখন স্বাস্থ্যকর্মী আপনাকে পরিদর্শন করেন তখন আপনার বাচ্চার বয়স কত ছিল?) | [# days of age]<br>( বাচ্চার বয়স কতদিন ছিল)                                                             | ---     |  |
| 203                                                                                                                                                                         | From the first visit, until now, how many times after that did the SK visit you? (স্বাস্থ্যকর্মী প্রথম পরিদর্শন থেকে আজকের পূর্বে পয়ত্ত আপনাকে মোট কতবার পরিদর্শন করেছেন?)                                      | [# visits during pregnancy/following delivery]<br>(কতবার পরিদর্শন হয়েছে গর্ভকালীন ও প্রসবপরবর্তী সময়ে) | ---     |  |
| 204                                                                                                                                                                         | Before today, when was the last time the SK visited you at home? (আজকের পূর্বে স্বাস্থ্যকর্মী কবে আপনাকে পরিদর্শন করেছেন?)                                                                                       | [# days – if more than 1 month, add 30 days for each month]<br>(দিনে উল্লেখ করুন)                        | ---     |  |
| Exposure to SS and SK Home Visits – Non-validated measures<br>স্বাস্থ্যসেবিকা ও স্বাস্থ্যকর্মীর বাড়ী পরিদর্শনের তথ্য -                                                     |                                                                                                                                                                                                                  |                                                                                                          |         |  |
| 205                                                                                                                                                                         | During the last home visit, how much time did she spend with you?                                                                                                                                                | [# minutes]<br>(মিনিট উল্লেখ করুন)                                                                       | ---     |  |

|     |                                                                                                                                                                                                                                                                                                                                                  |                                                                                                                                                                                                                                                                                                                                                                                                                                                                             |                       |  |
|-----|--------------------------------------------------------------------------------------------------------------------------------------------------------------------------------------------------------------------------------------------------------------------------------------------------------------------------------------------------|-----------------------------------------------------------------------------------------------------------------------------------------------------------------------------------------------------------------------------------------------------------------------------------------------------------------------------------------------------------------------------------------------------------------------------------------------------------------------------|-----------------------|--|
|     | (শেষবার আপনাকে পরিদর্শনের সময় স্বাস্থ্যকর্মী আপনার সাথে কতসময় ব্যয় করেছিলেন?)                                                                                                                                                                                                                                                                 |                                                                                                                                                                                                                                                                                                                                                                                                                                                                             |                       |  |
| 206 | At the last home visit, did she talk to you about breastfeeding, child feeding, or nutrition?<br>(শেষবার পরিদর্শনের সময় স্বাস্থ্যকর্মী কি আপনাকে বুকের দুধ খাওয়ানো, বাচ্চার খাবার ও পুষ্টি নিয়ে কথা বলেছিলেন?)                                                                                                                                | 1. Yes (হ্যাঁ)<br>2. No(না)                                                                                                                                                                                                                                                                                                                                                                                                                                                 | —                     |  |
| 207 | Did she talk about breastfeeding at her last visit? (শেষবার পরিদর্শনের সময় তিনি কি বুকের দুধ খাওয়ানো নিয়ে কথা বলেছিলেন?)                                                                                                                                                                                                                      | 1. Yes (হ্যাঁ)<br>2. No (না)                                                                                                                                                                                                                                                                                                                                                                                                                                                | —                     |  |
| 208 | Did she talk about complementary feeding at her last visit? (শেষবার পরিদর্শনের সময় তিনি কি শিশুর বাড়তি খাবার নিয়ে কথা বলেছিলেন?)                                                                                                                                                                                                              | 1. Yes (হ্যাঁ)<br>2. No(না)                                                                                                                                                                                                                                                                                                                                                                                                                                                 | —                     |  |
| 209 | What advice did you receive from the SK on nutrition and feeding your child during her last visit?<br>[Multiple responses possible; do NOT read responses to participant]<br>(শেষবার পরিদর্শনে আপনি স্বাস্থ্যকর্মীর নিকট হতে শিশুর পুষ্টি ও খাদ্য নিয়ে কি ধরনের পরামর্শ পেয়েছিলেন?<br>(একাধিক উত্তর প্রযোজ্য: উত্তর দাতার কাছে উত্তর বলবেন না) | 1. Putting baby to breast immediately after birth (জন্মের সাথে সাথে বাচ্চাকে বুকে লাগানো)<br>2. Giving only colostrum (বাচ্চার মুখে শুধুমাত্র শাল দুধ দেওয়া )<br>3. No pre- or post lacteals (honey/ mustard oil/ glucose water) (বুকের দুধ ছাড়া অন্য কোন তরল খাবার না খাওয়ানো) মধু/সরষের তেল/চিনির পানি)<br>4. Feed only breast milk up to 6 months (৬মাস পর্যন্ত শুধু মাত্র বুকের দুধ খাওয়ানো)<br>5. Positioning & attachment for breast feeding (বুকের দুধ খাওয়ানোর | —<br>—<br>—<br>—<br>— |  |

বাংলাদেশ ম্যাটারনাল আউট কাম নিউটিশন ইন্টারভেনশন সাক্ষাৎকার ফরম ভার্সন ১.০

এফএইচআই ৩৬০ গবেষণা #৯৪৯৭৫৭

পিএইচসি তে জমা দেবার তারিখঃ ২৭ অগাস্ট ২০১৬

পরিমার্জিত : ২৭ অগাস্ট ২০১৬

|     |                                                                                                                                                                                                          |                                                                                                                                                                                                                                                                                                                                                                                                                                                                                                                                                                                                                                                                                                                             |       |                                                          |
|-----|----------------------------------------------------------------------------------------------------------------------------------------------------------------------------------------------------------|-----------------------------------------------------------------------------------------------------------------------------------------------------------------------------------------------------------------------------------------------------------------------------------------------------------------------------------------------------------------------------------------------------------------------------------------------------------------------------------------------------------------------------------------------------------------------------------------------------------------------------------------------------------------------------------------------------------------------------|-------|----------------------------------------------------------|
|     |                                                                                                                                                                                                          | <p>সংযোগ ও অবস্থান<br/>সংযোগ সম্পর্কে বলা)</p> <p>6. Feeding mashed family food after 6 months (৬ মাস পর নরম করে বাড়তি/পারিবারিক খাবার খাওয়ানো)</p> <p>7. Feeding animal source foods (প্রানিজ উৎসের খাবার খাওয়ানো)</p> <p>8. Cooking/adding with oil (রান্নার তেল যোগ করা)</p> <p>9. Adding MNP to child's food (বাচ্চার খাবারে পুষ্টিকনা মেশানো)</p> <p>10. Washing hands with water and soap before prep/feeding child (খাদ্য তৈরীর আগে ও শিশুকে খাওয়ানোর আগে সাবান ও পানি দিয়ে হাত ধোয়া)</p> <p>11. Feeding during illness/ extra after illness (অসুস্থ অবস্থায় শিশুকে খাওয়ানো/সুস্থ হওয়ার পর বেশী করে খাওয়ানো)</p> <p>12. Other (specify)<br/>অন্যান্য: (নির্দিষ্ট করুন)</p> <p>13. Don't know (জানি না)</p> |       |                                                          |
| 210 | During the last home visit, how long did she spend talking with you about only nutrition and child feeding? (শেষবার পরিদর্শনের সময় স্বাস্থ্যকর্মী পুষ্টি বা বাচ্চার খাবার নিয়ে কতসময় ব্যয় করেছিলেন?) | [# minutes]<br>(মিনিটে উল্লেখ করুন)                                                                                                                                                                                                                                                                                                                                                                                                                                                                                                                                                                                                                                                                                         | _____ |                                                          |
| 211 | The last time you saw the SK; did she give any advice to you about your own health? (শেষবার পরিদর্শনের সময় যখন স্বাস্থ্যকর্মী এসেছিলেন তখন কি                                                           | 1. Yes (হ্যাঁ)<br>2. No (না)                                                                                                                                                                                                                                                                                                                                                                                                                                                                                                                                                                                                                                                                                                | _____ | If 2 (No), go to 213.<br>যদি না (২) হয় তবে ২১৩ যেতে হবে |

বাংলাদেশ ম্যাটারনাল আউট কাম নিউটিশন ইন্টারভেনশন সাক্ষাৎকার ফরম ভার্সন ১.০

এফএইচআই ৩৬০ গবেষণা #৯৪৯৭৫৭

পিএইচসি তে জমা দেবার তারিখঃ ২৭ অগাস্ট ২০১৬

পরিমার্জিত : ২৭ অগাস্ট ২০১৬



|     |                                                                                                                                                                                                                         |                                                                                                                                                                                                                                                                                                                                                                                                        |                         |                                                           |
|-----|-------------------------------------------------------------------------------------------------------------------------------------------------------------------------------------------------------------------------|--------------------------------------------------------------------------------------------------------------------------------------------------------------------------------------------------------------------------------------------------------------------------------------------------------------------------------------------------------------------------------------------------------|-------------------------|-----------------------------------------------------------|
|     |                                                                                                                                                                                                                         | <p>evereday (প্রতিদিন<br/>আয়রন ও ক্যালসিয়াম<br/>ট্যাবলেট খেতে বলা)</p> <p>12. Take rest for 2<br/>hours/day (দিন<br/>কমপক্ষে ২ ঘন্টা বিশ্রাম<br/>নিতে বলা )</p> <p>13. Did not let you<br/>lift heavy work<br/>load during<br/>pregnancy<br/>(গর্ভকালীন সময়ে ভারী<br/>কাজ করতে নিরুৎসাহিত<br/>করা)</p> <p>14. Other (specify)<br/>অন্যান্য (নির্দিষ্ট করুন)</p> <p>99. Don't know (জানি<br/>না)</p> |                         |                                                           |
| 213 | Have you ever attended a health education forum (Shasto Forum) organized by SK? (স্বাস্থ্যকর্মীর কোন স্বাস্থ্য শিক্ষা বিষয়ক সভায় অংশগ্রহণ করেছেন কি?)                                                                 | <p>1. Yes (হ্যাঁ)</p> <p>2. No (না)</p>                                                                                                                                                                                                                                                                                                                                                                | —                       | If 2 (No), go to 217.<br>যদি না (২) হয়, তবে ২১৭ যেতে হবে |
| 214 | Have you attended a health education forum within the past 6 months organized by SK? (গত ৬মাস স্বাস্থ্যকর্মী আয়োজিত কোন স্বাস্থ্যশিক্ষা বিষয়ক সভায় অংশ গ্রহণ করেছেন কি?)                                             | <p>1. Yes (হ্যাঁ)</p> <p>2. No (না)</p>                                                                                                                                                                                                                                                                                                                                                                | —                       |                                                           |
| 215 | During your last Health Forum with the SK, how much time did you spend there? (আপনি সর্বশেষ স্বাস্থ্যকর্মীর স্বাস্থ্য শিক্ষা বিষয়ক সভায় কতসময় অংশ গ্রহণ করেছেন?)                                                     | [# minutes]<br>(মিনিট উল্লেখ করুন)                                                                                                                                                                                                                                                                                                                                                                     | — — —                   |                                                           |
| 216 | Last time you attended a health forum, what did the SK talk about? [Multiple responses possible; do NOT read responses to participant] (সর্বশেষ স্বাস্থ্যকর্মীর স্বাস্থ্য শিক্ষা বিষয়ক সভায় কি নিয়ে আলোচনা হয়েছিল?) | <p>1. Advice on family planning (পরিবার পরিকল্পনা সম্পর্কিত পরামর্শ)</p> <p>2. Advice on water and sanitation (পানি ও পয়ঃ নিষ্কাশন বিষয়ক পরামর্শ)</p> <p>3. Immunization (শিশুর টিকা)</p>                                                                                                                                                                                                            | — — —<br>— — —<br>— — — |                                                           |

বাংলাদেশ ম্যাটারনাল আউট কাম নিউটিশন ইন্টারভেনশন সাক্ষাৎকার ফরম ভার্সন ১.০

এফএইচআই ৩৬০ গবেষণা #৯৪৯৭৫৭

পিএইচসি তে জমা দেবার তারিখঃ ২৭ অগাস্ট ২০১৬

পরিমার্জিত : ২৭ অগাস্ট ২০১৬

|     |                                                    |                                                                                                                                                                                                                                                                                                                                                                                                                                                                                                                                                                                                                                                                                                                                                                                                                                                                                           |  |  |
|-----|----------------------------------------------------|-------------------------------------------------------------------------------------------------------------------------------------------------------------------------------------------------------------------------------------------------------------------------------------------------------------------------------------------------------------------------------------------------------------------------------------------------------------------------------------------------------------------------------------------------------------------------------------------------------------------------------------------------------------------------------------------------------------------------------------------------------------------------------------------------------------------------------------------------------------------------------------------|--|--|
|     |                                                    | <p>4. Maternal diet (5 types of food)<br/>গর্ভবতির খাবার (৫ ধরনের খাবার)</p> <p>5. Taking IFA and calcium tablets<br/>(আয়রন ও ক্যালসিয়াম ট্যাবলেট সম্পর্কে আলোচনা)</p> <p>6. Advice on TB (যক্ষা সংক্রান্ত পরামর্শ)</p> <p>7. Advice on breastfeeding<br/>(বুকের দুধ সম্পর্কে পরামর্শ)</p> <p>8. Advice on complementary feeding (শিশুর বাড়তি খাবার সম্পর্কে পরামর্শ)</p> <p>9. Adding MNP (শিশুর খাবারে পুষ্টিকনা যোগ করা)</p> <p>10. Washing hands with water and soap before prep/feeding child (শিশুকে খাবার খাওয়ানোর আগে ও পরে সাবান ও পানি দিয়ে হাত পরিস্কার করা)</p> <p>11. Encouraging child to eat enough (শিশুকে খাবার খেতে উৎসাহ দেওয়া)</p> <p>12. Feeding during illness/extra after illness (অসুস্থ অবস্থায় শিশুকে খাওয়ানো/ সুস্থ হওয়ার পর বেশি করে খাবার খাওয়ানো)</p> <p>13. Other(specify)<br/>অন্যান্য (নির্দিষ্ট করুন)</p> <p>99. Don't know<br/>(জানি না)</p> |  |  |
| 217 | Were you visited by the SS during the 7-8 month of | 1. Yes (হ্যাঁ)                                                                                                                                                                                                                                                                                                                                                                                                                                                                                                                                                                                                                                                                                                                                                                                                                                                                            |  |  |

বাংলাদেশ ম্যাটারনাল আউট কাম নিউটিশন ইন্টারভেনশন সাক্ষাৎকার ফরম ভার্সন ১.০  
এফএইচআই ৩৬০ গবেষণা #৯৪৯৭৫৭  
পিএইচসি তে জমা দেবার তারিখঃ ২৭ অগাস্ট ২০১৬  
পরিমার্জিত ঃ ২৭ অগাস্ট ২০১৬

|     |                                                                                                                                                                                                                              |                                                                                                                        |     |  |
|-----|------------------------------------------------------------------------------------------------------------------------------------------------------------------------------------------------------------------------------|------------------------------------------------------------------------------------------------------------------------|-----|--|
|     | your pregnancy period?<br>(আপনার গর্ভাবস্থায় ৭ম থেকে ৮ম মাসের সময় স্বাস্থ্যসেবিকা পরিদর্শন করেছিলেন?)                                                                                                                      | 2. No (না)                                                                                                             |     |  |
| 218 | How many times did the SS visit you during the 7-8th month of your pregnancy period?<br>(আপনার গর্ভাবস্থায় ৭ম থেকে ৮ম মাসের সময় স্বাস্থ্য সেবিকা আপনাকে কতবার পরিদর্শন করেছিলেন?)                                          | [# visits during 7-8 <sup>th</sup> month pregnancy]<br>(৭ম থেকে ৮ম মাসে কতবার ভিজিট করেছেন?)                           | ___ |  |
| 219 | After giving birth to your new baby, how old was he/she when the SS first visited you after the delivery?<br>(বাচ্চা/সন্তান প্রসব করার পর প্রথম যখন স্বাস্থ্য সেবিকা আপনাকে পরিদর্শন করেছিলেন তখন আপনার বাচ্চার বয়স কতছিল?) | [# days of age]<br>(কত দিন বয়স)                                                                                       | ___ |  |
| 220 | From the first visit, until now, how many times after that did the SS visit you?<br>(স্বাস্থ্যসেবিকা প্রথম পরিদর্শন থেকে বর্তমান সময় পর্যন্ত মোট কতবার আপনাকে পরিদর্শন করেছিলেন?)                                           | [# visits during pregnancy/ following delivery]<br>(গর্ভাবস্থা থেকে প্রসব পরবর্তী সময় পর্যন্ত)                        | ___ |  |
| 221 | Before today, when was the last time the SS visited you at home?<br>(আজকের পূর্বে স্বাস্থ্যসেবিকা কবে আপনাকে পরিদর্শন করেছিলেন?)                                                                                             | [# days – if more than 1 month, add 30 days for each month]<br>(দিন- ১মাসের উপরে হলে প্রতিমাসে ৩০ দিন হিসেবে ধরতে হবে) | ___ |  |
| 222 | During the last home visit, how much time did she spend with you?<br>(শেষবার আপনাকে পরিদর্শনের সময় স্বাস্থ্যসেবিকা আপনার সাথে কতক্ষণ/কতসময় ব্যয় করেছিলেন?)                                                                | [# minutes]/<br>(মিনিটে উল্লেখ করুন)                                                                                   | ___ |  |
| 223 | At the last home visit, did she talk to you about breastfeeding, child feeding, or nutrition?<br>(শেষবার পরিদর্শনের সময় স্বাস্থ্যসেবিকা কি আপনাকে বুকের দুধ খাওয়ানো, বাচ্চার খাবার ও পুষ্টি নিয়ে কথা বলেছিলেন?)           | 1. Yes(হ্যাঁ)<br>2. No(না)                                                                                             | ___ |  |

বাংলাদেশ ম্যাটারনাল আউট কাম নিউটিশন ইন্টারভেনশন সাক্ষাৎকার ফরম ভার্সন ১.০

এফএইচআই ৩৬০ গবেষণা #৯৪৯৭৫৭

পিএইচসি তে জমা দেবার তারিখঃ ২৭ অগাস্ট ২০১৬

পরিমার্জিত : ২৭ অগাস্ট ২০১৬





|     |                                                                                                                                                                                                        |                                                                                                                                                                                                                                                                                                                                                                                                                                                                                                                                      |                                              |                                                     |
|-----|--------------------------------------------------------------------------------------------------------------------------------------------------------------------------------------------------------|--------------------------------------------------------------------------------------------------------------------------------------------------------------------------------------------------------------------------------------------------------------------------------------------------------------------------------------------------------------------------------------------------------------------------------------------------------------------------------------------------------------------------------------|----------------------------------------------|-----------------------------------------------------|
|     |                                                                                                                                                                                                        | <p>(প্রানিজ উৎসের খাবার খাওয়ানো)</p> <p>8. Cooking/adding with oil (রান্নায় তেল যোগ করা)</p> <p>9. Adding MNP to child's food (বাচ্চার খাবারে পুষ্টিকনা মেশানো)</p> <p>10. Washing hands with water and soap before prep/feeding child (খাদ্য তৈরীর আগে ও শিশুকে খাওয়ানোর আগে সাবান ও পানি দিয়ে হাত ধোয়া)</p> <p>11. Feeding during illness/extra after illness (অসুস্থ অবস্থায় শিশুকে খাওয়ানো/ সুস্থ হওয়ার পরে বেশি করে খাওয়ানো)</p> <p>12. Other (specify) (অন্যান্যঃ নির্দিষ্ট করুন)</p> <p>99. Don't know (জানি না)</p> | <p>—</p> <p>—</p> <p>—</p> <p>—</p> <p>—</p> |                                                     |
| 227 | During the last home visit, how long did she spend talking with you about only nutrition and child feeding? (শেষবার পরিদর্শনের সময় তিনি পুষ্টি ও বাচ্চার খাবার নিয়ে কতক্ষণ/কতসময় ব্যয় করেছিলেন?)   | [# minutes]<br>(মিনিটে উল্লেখ করুন)                                                                                                                                                                                                                                                                                                                                                                                                                                                                                                  | — — —                                        |                                                     |
| 228 | The last time you saw the SS, did you purchase any kind of medicine or health items from her? (শেষবার পরিদর্শনের সময় আপনি কি স্বাস্থ্য সেবিকার কাছ থেকে কোন স্বাস্থ্য সামগ্রী / ওষুদ ক্রয় করেছিলেন?) | <p>1. Yes (হ্যাঁ)</p> <p>2. No (না)</p>                                                                                                                                                                                                                                                                                                                                                                                                                                                                                              | —                                            | If 2 (No), go to 231/যদি না(২)হয়, তবে ২৩১ যেতে হবে |
| 229 | What kind of medicine or health items did you purchase from the SS? [Multiple responses possible; do NOT read list to participant] (আপনি কি ধরনের স্বাস্থ্য সামগ্রী /ওষুদ ক্রয় করেছিলেন?)             | <p>1. IFA (আয়রন ট্যাবলেট)</p> <p>2. Calcium (ক্যালসিয়াম ট্যাবলেট)</p> <p>3. Paracetamol (প্যারাসিটামল)</p> <p>4. Vitamin (ভিটামিন)</p> <p>5. Anti-Histamine (এন্টি হিস্টামিন)</p>                                                                                                                                                                                                                                                                                                                                                  | <p>—</p> <p>—</p> <p>—</p> <p>—</p>          |                                                     |

বাংলাদেশ ম্যাটারনাল আউট কাম নিউটিশন ইন্টারভেনশন সাক্ষাৎকার ফরম ভার্সন ১.০

এফএইচআই ৩৬০ গবেষণা #৯৪৯৭৫৭

পিএইচসি তে জমা দেবার তারিখঃ ২৭ অগাস্ট ২০১৬

পরিমার্জিত ঃ ২৭ অগাস্ট ২০১৬

|     |                                                                                                                                                                                                                                      |                                                                                                                                                                                                                                                                                                                                                                                                                                                                                                                                                                                |                                                               |                                                            |
|-----|--------------------------------------------------------------------------------------------------------------------------------------------------------------------------------------------------------------------------------------|--------------------------------------------------------------------------------------------------------------------------------------------------------------------------------------------------------------------------------------------------------------------------------------------------------------------------------------------------------------------------------------------------------------------------------------------------------------------------------------------------------------------------------------------------------------------------------|---------------------------------------------------------------|------------------------------------------------------------|
|     |                                                                                                                                                                                                                                      | <p>6. Family planning material<br/>(পরিবার পরিকল্পনা সামগ্রী)</p> <p>7. Soap (সাবান)</p> <p>8. Sanitary Napkin<br/>(স্যানিটারী ন্যাপকিন)</p> <p>9. Delivery kits<br/>(ডেলিভারী কীট)</p> <p>10. Salt (with iodine) (আয়োডিন যুক্ত লবন)</p> <p>11. Syrup (সিরাপ)</p> <p>12. Pushtikona<br/>(পুষ্টিকনা)</p> <p>13. Monimix<br/>(মনিমিক্স)</p> <p>14. MyMix<br/>(মাই মিক্স)</p> <p>15. ORS<br/>(ওর স্যালাইন)</p> <p>14. Didn't buy anything in last month (শেষ মাসে কোন ক্রয় করে নি)</p> <p>15. Other (specify)<br/>অন্যান্য (নির্দিষ্ট করুন)</p> <p>99. Don't know (জানি না)</p> | <p>—</p> <p>—</p> <p>(Specify):</p> <p>_____</p> <p>_____</p> |                                                            |
| 230 | <p>How much in total did you pay when you bought medicine and health items from SS/PS during her last visit??<br/>(সর্বশেষ বার স্বাস্থ্য সেবিকা/পিএস এর কাছ থেকে স্বাস্থ্য সামগ্রী/ ওষুধ ক্রয় করার সময় কত টাকা ব্যয় করেছিলেন)</p> | <p>[Enter amount in Taka]<br/>(টাকার পরিমাণ উল্লেখ করুন)</p>                                                                                                                                                                                                                                                                                                                                                                                                                                                                                                                   | <p>_____ Tk.</p>                                              |                                                            |
| 231 | <p>During her last visit, did you receive any advice from the SS on Pushtikona?<br/>[Show the Pushtikona packet] (স্বাস্থ্য সেবিকার শেষ পরিদর্শনে আপনি পুষ্টিকনা সম্পর্কে কোন পরামর্শ পেয়েছিলেন কিনা?)</p>                          | <p>1. Yes (হ্যাঁ)<br/>2. No (না)</p>                                                                                                                                                                                                                                                                                                                                                                                                                                                                                                                                           | <p>—</p>                                                      | <p>If 2 (No), go to 300/যদি না(২)হয়, তবে ৩০০ যেতে হবে</p> |
| 232 | <p>During the last purchase, how many packets of</p>                                                                                                                                                                                 |                                                                                                                                                                                                                                                                                                                                                                                                                                                                                                                                                                                | <p>_____</p>                                                  |                                                            |

বাংলাদেশ ম্যাটারনাল আউট কাম নিউটিশন ইন্টারভেনশন সাক্ষাৎকার ফরম ভার্সন ১.০

এফএইচআই ৩৬০ গবেষণা #৯৪৯৭৫৭

পিএইচসি তে জমা দেবার তারিখঃ ২৭ অগাস্ট ২০১৬

পরিমার্জিত ঃ ২৭ অগাস্ট ২০১৬

|                                |                                                                                                                                                                                                                                                                                                                                                                                                                                 |                                                                                                                     |                                                                                        |  |
|--------------------------------|---------------------------------------------------------------------------------------------------------------------------------------------------------------------------------------------------------------------------------------------------------------------------------------------------------------------------------------------------------------------------------------------------------------------------------|---------------------------------------------------------------------------------------------------------------------|----------------------------------------------------------------------------------------|--|
|                                | Pustikona did you buy?<br>(সর্বশেষ পরিদর্শনে কত প্যাকেট<br>পুষ্টিকনা ক্রয় করেছিলেন?)                                                                                                                                                                                                                                                                                                                                           | [# packets]<br>(কত প্যাকেট উল্লেখ করুন)                                                                             |                                                                                        |  |
| Obstetric History & ANC Course |                                                                                                                                                                                                                                                                                                                                                                                                                                 |                                                                                                                     |                                                                                        |  |
| 300                            | Number of prior pregnancies<br>(কততম গর্ভ)                                                                                                                                                                                                                                                                                                                                                                                      | Number of pregnancies (Will be 01 if first pregnancy; include miscarriages)<br>(বর্তমান প্রসব সহ মোট গর্ভের সংখ্যা) | ___ ___                                                                                |  |
| 301                            | Number of prior miscarriages<br>(পূর্বের গর্ভ পাতের সংখ্যা)                                                                                                                                                                                                                                                                                                                                                                     |                                                                                                                     | ___ ___                                                                                |  |
| 302                            | Number of prior preterm deliveries (পূর্বের গর্ভের অপরিণত শিশু জন্মের সংখ্যা)                                                                                                                                                                                                                                                                                                                                                   | Delivery $\leq 8$ months' gestation (<2500 kg) চমাসের আগে প্রসব হলে (২৫০০গ্রাম এর নিচে হলে)                         | ___ ___                                                                                |  |
| 303                            | Number of prior term deliveries<br>(পূর্বের গর্ভের পরিণত শিশু জন্মের সংখ্যা)                                                                                                                                                                                                                                                                                                                                                    | Delivery 9 months or later gestation ( $\geq 2500$ kg)<br>(৯মাস পূর্ণ অথবা ২৫০০গ্রামের উপরে)                        | ___ ___                                                                                |  |
| 304                            | Number of living children (includes child from this most recent pregnancy)<br>(পরিণত /জীবিত শিশুর সংখ্যা (বর্তমান শিশুটি সহ)                                                                                                                                                                                                                                                                                                    |                                                                                                                     | ___ ___                                                                                |  |
| 305                            | Have you ever been told <b>before</b> you were pregnant that you have any of the following conditions:<br>(গর্ভবতী হওয়ার পূর্বে আপনার কোন শারীরিক সমস্যা ছিল কি?)<br>a. Diabetes(ডায়াবেটিস)<br>b. High blood pressure (উচ্চ রক্ত চাপ)<br>c. when not pregnant/ Malnutrition – too (অতিরিক্ত-অপুষ্টি)<br>d. under-weight (কম ওজন)<br>e. Too short (অতিরিক্ত খাটো)<br>f. Asthma (হাঁপানি/শ্বাস কষ্ট)<br>g. Tuberculosis (যক্ষা) | 1=Yes (হ্যাঁ)<br>2=No (না)                                                                                          | a. ___<br>b. ___<br>c. ___<br>d. ___<br>e. ___<br>f. ___<br>g. ___<br>h. ___<br>i. ___ |  |

বাংলাদেশ ম্যাটারনাল আউট কাম নিউটিশন ইন্টারভেনশন সাক্ষাৎকার ফরম ভার্সন ১.০

এফএইচআই ৩৬০ গবেষণা #৯৪৯৭৫৭

পিএইচসি তে জমা দেবার তারিখঃ ২৭ অগাস্ট ২০১৬

পরিমার্জিত : ২৭ অগাস্ট ২০১৬

|     |                                                                                                                                                                                                          |                                                                                                                                                                                        |                                                   |                                                     |
|-----|----------------------------------------------------------------------------------------------------------------------------------------------------------------------------------------------------------|----------------------------------------------------------------------------------------------------------------------------------------------------------------------------------------|---------------------------------------------------|-----------------------------------------------------|
|     | <p>h. Anemia, pallor (রক্ত স্রঞ্জতা)</p> <p>i. Heart condition /rheumatic heart disease (হাটের সমস্যা)</p> <p>j. Kidney disease (কিডনীর সমস্যা)</p> <p>k. Other (specify): অন্যান্য (নির্দিষ্ট করুন)</p> |                                                                                                                                                                                        | <p>j. ___</p> <p>k. ___</p> <p>Specify: _____</p> |                                                     |
| 306 | <p>Do you have birth planning during your last pregnancy?<br/>(শেষ গর্ভাবস্থায় কোন আপনার প্রসব পরিকল্পনা ছিল কি?)</p>                                                                                   | <p>1. Yes/হ্যাঁ</p> <p>2. No/না</p>                                                                                                                                                    | _____                                             | If 2 (No), go to 308/যদি না(২)হয়, তবে ৩০৮ যেতে হবে |
| 307 | <p>Where did you plan to go for delivery?(প্রসবের পরিকল্পনা কোথায় ছিল?)</p>                                                                                                                             | <p>1. Home(বাড়ীতে)</p> <p>2. Hospital (হাসপাতালে)</p> <p>3. Other(specify)অন্যান্য (নির্দিষ্ট করুন)</p>                                                                               | <p>_____</p> <p>Specify: _____</p>                |                                                     |
| 308 | <p>Where did your delivery occur?(কোথায় প্রসব হয়েছিল?)</p>                                                                                                                                             | <p>1. Home(বাড়ীতে)</p> <p>2. Hospital (হাসপাতালে)</p> <p>3. In vehicle on way to hospital (হাসপাতালে নেয়ার পথে)</p> <p>4. Other (specify) অন্যান্য (উল্লেখ করুন)</p>                 | <p>_____</p> <p>Specify: _____</p>                |                                                     |
| 309 | <p>What date did you deliver?<br/>(প্রসবের তারিখ)</p>                                                                                                                                                    | <p>Day/month/year Gregorian; for single digit day or month, write 0 first (ex: July=07)<br/>(দিন/মাস/বছর)</p>                                                                          | <p>___ ___/___</p> <p>___/___ ___</p>             |                                                     |
| 310 | <p>What type of delivery did you have?<br/>(কি ধরনের প্রসব হয়েছিল?)</p>                                                                                                                                 | <p>1. Normal vaginal(নরমাল)</p> <p>2. Cesarean section(সিজার)</p> <p>3. Assisted vaginal (vacuum) (ভেকুম)</p>                                                                          | _____                                             | If 1 or 3, go to 312.                               |
| 311 | <p>If Cesarean, what was the reason?(কেন সিজার করেছিলেন?)</p>                                                                                                                                            | <p>1. Medical/problem (মেডিকেল সমস্যা ছিল)</p> <p>2. Familychoice/pref erence (পরিবারের ইচ্ছা ছিল)</p> <p>3. Doctor recommended (ডাক্তারের পরামর্শ ছিল?)</p> <p>4. Other (specify)</p> | <p>_____</p> <p>Specify: _____</p>                |                                                     |

বাংলাদেশ ম্যাটারনাল আউট কাম নিউটিশন ইন্টারভেনশন সাক্ষাৎকার ফরম ভার্সন ১.০

এফএইচআই ৩৬০ গবেষণা #৯৪৯৭৫৭

পিএইচসি তে জমা দেবার তারিখঃ ২৭ অগাস্ট ২০১৬

পরিমার্জিত ঃ ২৭ অগাস্ট ২০১৬

|     |                                                                                                                                     | অন্যান্য (নির্দিষ্ট করণ)                                                                                                                                                                                                    |                        |                                                      |
|-----|-------------------------------------------------------------------------------------------------------------------------------------|-----------------------------------------------------------------------------------------------------------------------------------------------------------------------------------------------------------------------------|------------------------|------------------------------------------------------|
| 312 | Have you received/are you using contraception postpartum?<br>(এখন কোন পরিবার পরিকল্পনা পদ্ধতি ব্যবহার করছেন কি?)                    | ১. Yes(হ্যাঁ)<br>২. No(না)                                                                                                                                                                                                  | —                      | If 2 (No), go to 314.(যদি না হয় তাহলে ৩১৪ যেতে হবে) |
| 313 | Which method are you using?<br>(কোন পদ্ধতি ব্যবহার করছেন?)                                                                          | 1. Male condoms(কনডম)<br>2. Oral contraceptive pills<br>(খাবার বড়ি)<br>3. DepoProvera Injection<br>(ইনজেকশন)<br>4. Implant (Norplant)<br>(ইমপ্লান্ট)<br>5. IUD(আই ইউ ডি)<br>6. Other (specify):<br>অন্যান্য(নির্দিষ্ট করণ) | —<br>Specify:<br>_____ |                                                      |
| 314 | Are you planning to use contraception postpartum?<br>(আপনার কোন পরিবার পরিকল্পনা পদ্ধতি ব্যবহারের পরিকল্পনা আছে কি?)                | 1. Yes(হ্যাঁ)<br>2. No(না)                                                                                                                                                                                                  | —                      | If 2 (No), go to 316/যদি না(২)হয়, তবে ৩১৬ যেতে হবে  |
| 315 | What method do you plan to use?<br>(কোন পদ্ধতি ব্যবহারের পরিকল্পনা আছে?)                                                            | 1. Male condoms/কনডম<br>2. Oral contraceptive pills/খাবার বড়ি<br>3. DepoProvera Injection/ইনজেকশন<br>4. Implant (Norplant)/<br>ইমপ্লান্ট<br>৫. IUD/আই ইউ ডি<br>6. Other (specify):/অন্যান্য<br>(নির্দিষ্টকরণ)              | —<br>Specify:<br>_____ |                                                      |
| 316 | At birth or soon after, did you receive a dose of Vitamin A? (বাচ্চা হওয়ার সময় অথবা বাচ্চা হওয়ার পরে ভিটামিন এ খেয়েছিলেন কিনা?) | 1. Yes/হ্যাঁ<br>2. No/না                                                                                                                                                                                                    | —                      |                                                      |

Pregnancy Complication Validation  
(গর্ভকালীন জটিলতা যাচাই করণ)

|     |                                                                                                                                                                                                                                                                                                                                                                                                                                                                                                                                                                            |                              |                                                                                                                  |                                                     |
|-----|----------------------------------------------------------------------------------------------------------------------------------------------------------------------------------------------------------------------------------------------------------------------------------------------------------------------------------------------------------------------------------------------------------------------------------------------------------------------------------------------------------------------------------------------------------------------------|------------------------------|------------------------------------------------------------------------------------------------------------------|-----------------------------------------------------|
| 400 | Did you have any complications during your pregnancy, that is, <b>before</b> you went into labor? (গর্ভাবস্থায় আপনার কি কোন ধরনের জটিলতা ছিল?)                                                                                                                                                                                                                                                                                                                                                                                                                            | 1. Yes (হ্যাঁ)<br>2. No (না) | —                                                                                                                |                                                     |
| 401 | Which complications did you have: কি ধরনের জটিলতা ছিল?<br>a. Anemia / রক্ত স্বল্পতা<br>b. Severe vomiting/ অতিরিক্ত বমি বমি ভাব<br>c. Severe edema/ হাতেপায়ে পানি আসা<br>d. High blood pressure/উচ্চ রক্তচাপ<br>e. Vaginal bleeding জরায়ুর মুখ দিয়ে রক্ত আসা<br>f. Pre eclampsia/ খিচুনি<br>g. Diabetes/ ডায়াবেটিস<br>h. High fever/ ভীষন জ্বর<br>i. preterm labor/ আগে থেকে ব্যথা<br>j. Low weight gain/ কম ওজন<br>k. Leakage of fluid/preterm rupture of membranes/সময়ের আগে পানি ভাঙ্গা<br>l. Back pain/কোমর ব্যথা<br>m. Other (specify):/ অন্যান্য(নির্দিষ্ট করণ) | 1=Yes (হ্যাঁ)<br>2=No (না)   | a. —<br>b. —<br>c. —<br>d. —<br>e. —<br>f. —<br>g. —<br>h. —<br>i. —<br>j. —<br>k. —<br>l. —<br>m. —<br>Specify: |                                                     |
| 402 | Did you go to the hospital for these complication?/আপনার এই জটিলতার জন্য হাসপাতালে গিয়েছিলেন কি?                                                                                                                                                                                                                                                                                                                                                                                                                                                                          | 1. Yes/হ্যাঁ<br>2. No/না     | —                                                                                                                | If 2 (No), go to 404/যদি না(২)হয়, তবে ৪০৪ যেতে হবে |
| 403 | What treatment did you receive from hospital?/ হাসপাতাল থেকে আপনি কি ধরনের চিকিৎসা নিয়েছিলেন?                                                                                                                                                                                                                                                                                                                                                                                                                                                                             |                              |                                                                                                                  |                                                     |

|     |                                                                                                                                                                                                                                 |                                                                                                                                                                                                                                                                                                                                                                                                                      |                                              |                                                                       |                                                                                                                   |
|-----|---------------------------------------------------------------------------------------------------------------------------------------------------------------------------------------------------------------------------------|----------------------------------------------------------------------------------------------------------------------------------------------------------------------------------------------------------------------------------------------------------------------------------------------------------------------------------------------------------------------------------------------------------------------|----------------------------------------------|-----------------------------------------------------------------------|-------------------------------------------------------------------------------------------------------------------|
|     | <p>a. Medicine- ঔষুধ</p> <p>b. Blood transfusion- রক্ত গ্রহণ</p> <p>c. Other (specify):/ অন্যান্য (নির্দিষ্ট করুন)</p>                                                                                                          | <p>a. 1=Yes</p> <p>b. 1=Yes</p> <p>c. 1=Yes</p>                                                                                                                                                                                                                                                                                                                                                                      | <p>a. 2=No</p> <p>b. 2=No</p> <p>c. 2=No</p> | <p>a. ___</p> <p>b. ___</p> <p>c. ___</p>                             |                                                                                                                   |
| 404 | <p>When did your labor start?<br/>কখন আপনার প্রসব ব্যথা উঠেছিল?</p>                                                                                                                                                             | <p>1. Early morning (4-7 AM) খুব সকালে(৪-৭)</p> <p>2. Mid-morning (7-9 AM) সকালে (৭-৯)</p> <p>3. Late morning (9AM – 12 PM)সকাল(৯-১২)</p> <p>4. Early afternoon (12 – 3 PM)দুপুর ১২-৩)</p> <p>5. Midafternoon (3-6 PM) দুপুর(৩-৬)</p> <p>6. Evening (6-9 PM) সন্ধ্যা (৬-৯)</p> <p>7. Night (9 PM – 12 AM) রাত(৯-১২)</p> <p>8. Late night (1 – 4 AM) রাত(১-৪)</p> <p>9. Not applicable (specify): (নির্দিষ্টকরুন)</p> |                                              | ___                                                                   | <p>Please validate the question against time since sunrise/set. If (9) go to 406 যদি ৯ হয়, তবে ৪০৬এ যেতে হবে</p> |
| 405 | <p>For how many hours did you experience labor? (ব্যথা উঠার কত ঘন্টা পর প্রসব হয়েছিল)</p>                                                                                                                                      | <p>Ask how much time in hours passed, using daylight if needed, between answer above and delivery. (ঘণ্টায় লিখুন)</p>                                                                                                                                                                                                                                                                                               |                                              | ___ ___                                                               |                                                                                                                   |
| 406 | <p>Did you have any complications <b>during labor and delivery</b>? (প্রসবের সময় কোন জটিলতা ছিল কি?)</p>                                                                                                                       | <p>1. Yes/হ্যাঁ</p> <p>2. No/না</p>                                                                                                                                                                                                                                                                                                                                                                                  |                                              | ___                                                                   | <p>If 2 (No), go to 410/যদি না(২)হয়, তবে ৪১০ যেতে হবে</p>                                                        |
| 407 | <p>Which complications did you have: / কি ধরনের জটিলতা ছিল?</p> <p>a. Pre-eclampsia (প্রি-এক লামশিয়া)</p> <p>b. Eclampsia/convulsions (একলামশিয়া)</p> <p>c. Heavy bleeding during labor (প্রসবের সময় প্রচণ্ড রক্ত স্রবন)</p> | <p>1=Yes (হ্যাঁ)</p> <p>2=No (না)</p>                                                                                                                                                                                                                                                                                                                                                                                |                                              | <p>a. ___</p> <p>b. ___</p> <p>c. ___</p> <p>d. ___</p> <p>e. ___</p> |                                                                                                                   |

বাংলাদেশ ম্যাটারনাল আউট কাম নিউটিশন ইন্টারভেনশন সাক্ষাৎকার ফরম ভার্সন ১.০

এফএইচআই ৩৬০ গবেষণা #৯৪৯৭৫৭

পিএইচসি তে জমা দেবার তারিখঃ ২৭ অগাস্ট ২০১৬

পরিমার্জিত ঃ ২৭ অগাস্ট ২০১৬



|     |                                                                                                                                                                                                                                                                                                                                                                                                                                                                                |                                                  |                                                                                                            |                                                              |
|-----|--------------------------------------------------------------------------------------------------------------------------------------------------------------------------------------------------------------------------------------------------------------------------------------------------------------------------------------------------------------------------------------------------------------------------------------------------------------------------------|--------------------------------------------------|------------------------------------------------------------------------------------------------------------|--------------------------------------------------------------|
|     | <p>d. Heavy bleeding after delivery<br/>(প্রসবের পর প্রচণ্ড রক্ত ক্ষরণ)</p> <p>e. Retained placenta<br/>গর্ভফুল আটকে থাকা</p> <p>f. Prolonged labor/<br/>দীর্ঘায়িত আটকে ব্যথা</p> <p>g. Obstructed labor<br/>বাধাগ্রস্ত ব্যথা</p> <p>h. Fever/infections<br/>জ্বর/ইনফেকশন</p> <p>i. Breech/non-cephalic presentation<br/>বচ্চার মাথা উপরের দিকে</p> <p>j. Fever/infection in labor<br/>জ্বর/ প্রসবের সময় ইনফেকশন</p> <p>k. Other (specify):<br/>.অন্যান্য( নিদিষ্ট করুন)</p> |                                                  | <p>f. ___</p> <p>g. ___</p> <p>h. ___</p> <p>i. ___</p> <p>j. ___</p> <p>k. ___<br/>Specify:<br/>_____</p> |                                                              |
| 408 | <p>Did you go to the hospital for these complications?<br/>আপনি কি এই সমস্যার জন্য হাসপাতালে গিয়েছিলেন?</p>                                                                                                                                                                                                                                                                                                                                                                   | <p>1. Yes/হ্যাঁ</p> <p>2. No/না</p>              | ___                                                                                                        | <p>If 2 (No), go to 410/যদি না (২) হয়, তবে ৪১০ যেতে হবে</p> |
| 409 | <p>What treatment did you receive from hospital?<br/>হাসপাতালে কি ধরনের সেবা নিয়েছিলেন?</p> <p>a. Medicine/ ঔষুধ</p> <p>b. Blood transfusion/রক্ত গ্রহণ</p> <p>c. Other (specify):<br/>অন্যান্য(নিদিষ্ট করুন)</p>                                                                                                                                                                                                                                                             | <p>a. 1=Yes</p> <p>b. 1=Yes</p> <p>c. 1= Yes</p> | <p>a. 2=No</p> <p>b. 2=No</p> <p>c. 2=No</p>                                                               | <p>___</p> <p>___</p> <p>___</p>                             |
| 410 | <p>Did you have any complications after the delivery?<br/>প্রসবের পর আপনার কোন ধরনের জটিলতা ছিল কি?</p>                                                                                                                                                                                                                                                                                                                                                                        | <p>1. Yes/হ্যাঁ</p> <p>2. No/না</p>              | ___                                                                                                        | <p>If 2 (No), go to 414/যদি না(২)হয়, তবে ৪১৪ যেতে হবে</p>   |
| 411 | <p>Which complications did you have: কি ধরনের জটিলতা ছিল?</p> <p>a. Eclampsia/convulsion<br/>(খিচুনী)</p> <p>b. Heavy bleeding after delivery<br/>(প্রসবের পর প্রচণ্ড রক্ত ক্ষরণ)</p>                                                                                                                                                                                                                                                                                          | <p>1=Yes (হ্যাঁ)</p> <p>2=No (না)</p>            | <p>a. ___</p> <p>b. ___</p> <p>c. ___</p>                                                                  |                                                              |

বাংলাদেশ ম্যাটারনাল আউট কাম নিউটিশন ইন্টারভেনশন সাক্ষাৎকার ফরম ভার্সন ১.০

এফএইচআই ৩৬০ গবেষণা #৯৪৯৭৫৭

পিএইচসি তে জমা দেবার তারিখঃ ২৭ অগাস্ট ২০১৬

পরিমার্জিত ঃ ২৭ অগাস্ট ২০১৬

|     |                                                                                                                                                                                                                                                                                                                                                                                                  |                                                 |                                                                                     |                                              |
|-----|--------------------------------------------------------------------------------------------------------------------------------------------------------------------------------------------------------------------------------------------------------------------------------------------------------------------------------------------------------------------------------------------------|-------------------------------------------------|-------------------------------------------------------------------------------------|----------------------------------------------|
|     | <p>c. Fever(জ্বর)</p> <p>d. severe lower abdominal pain<br/>(তল পেটে প্রচণ্ড ব্যথা)</p> <p>e. infection<br/>(ইনফেকশন)</p> <p>f. severe weakness<br/>অতিরিক্ত শারীরিক দুর্বলতা</p> <p>g. Other (specify):/<br/>অন্যান্য(নির্দিষ্ট করুন)</p>                                                                                                                                                       |                                                 | <p>d. ___</p> <p>e. ___</p> <p>f. ___</p> <p>g. ___</p> <p>___<br/>Specify</p>      |                                              |
| 412 | <p>Did you go to the hospital for these complications?<br/>(এই সমস্যার জন্য হাসপাতালে গিয়েছিলেন কি?)</p>                                                                                                                                                                                                                                                                                        | <p>1. Yes/হ্যাঁ</p> <p>2. No/না</p>             | ___                                                                                 | <p>If no, go to 414./না হলে ৪১৪ যেতে হবে</p> |
| 413 | <p>What treatment did you receive from hospital? কি ধরনের সেবা নিয়েছিলেন?</p> <p>a. Medicine/ ঔষুধ</p> <p>b. Blood transfusion/<br/>রক্ত গ্রহণ</p> <p>c. Other (specify):<br/>অন্যান্য(নির্দিষ্ট করুন)</p>                                                                                                                                                                                      | <p>a. 1=Yes</p> <p>b. 1=Yes</p> <p>c. 1=Yes</p> | <p>a. 2=No</p> <p>b. 2=No</p> <p>c. 2=No</p>                                        | <p>___</p> <p>___</p> <p>___</p>             |
| 414 | <p>Did your child face any complication after birth?<br/>(জন্মের পর আপনার শিশু কোন জটিলতা ছিল কি?)</p>                                                                                                                                                                                                                                                                                           | <p>1. Yes/হ্যাঁ</p> <p>2. No/না</p>             | ___                                                                                 | <p>If no, go to 500/ না হলে ৫০০ যেতে হবে</p> |
| 415 | <p>What complication did your child face after birth?<br/>(জন্মের পর আপনার শিশু কোন ধরনের জটিলতায় পরেছিল?)</p> <p>a. Child not sucking well/শিশু ঠিকমত বুকের দুধটানতে না পারা</p> <p>b. Vomiting/diarrhea<br/>/বমি/ ডায়রিয়া</p> <p>c. Umbilical cord infection /নাভীতে ইনফেকশন</p> <p>d. Skin rash/infection/ত্বকের সমস্যা</p> <p>e. Convulsion/খিচুনী</p> <p>f. Lethargic or not respond</p> | <p>1=Yes (হ্যাঁ)</p> <p>2=No (না)</p>           | <p>a. ___</p> <p>b. ___</p> <p>c. ___</p> <p>d. ___</p> <p>e. ___</p> <p>f. ___</p> |                                              |

|                                                                               |                                                                                                                                                                                                                                                                                                            |                                                                                                                                                                                                                                                                                                                                                                                                      |                                                                                              |  |
|-------------------------------------------------------------------------------|------------------------------------------------------------------------------------------------------------------------------------------------------------------------------------------------------------------------------------------------------------------------------------------------------------|------------------------------------------------------------------------------------------------------------------------------------------------------------------------------------------------------------------------------------------------------------------------------------------------------------------------------------------------------------------------------------------------------|----------------------------------------------------------------------------------------------|--|
|                                                                               | <p>properly/ঠিকমত<br/>নড়াচড়া না করা</p> <p>g. Redness of eye or<br/>discharge/চোখ লাল<br/>হয়ে যাওয়া</p> <p>h. Fever or<br/>hypothermia/অধিক<br/>তাপমাত্রা</p> <p>i. Rapid Breathing<br/>/ঘন ঘন শ্বাস নেওয়া</p> <p>j. Jaundice/জন্ডিস</p> <p>k. Other<br/>(specify):/অন্যান্য(<br/>নির্দিষ্ট করুন)</p> |                                                                                                                                                                                                                                                                                                                                                                                                      | <p>g. ____</p> <p>h. ____</p> <p>i. ____</p> <p>j. ____</p> <p>k. ____<br/>Specify _____</p> |  |
| <b>Current Breastfeeding Practices</b><br>(বর্তমানে বুকের দুধ খাওয়ানোর তথ্য) |                                                                                                                                                                                                                                                                                                            |                                                                                                                                                                                                                                                                                                                                                                                                      |                                                                                              |  |
| 500                                                                           | How long after birth did you first put your baby to the breast? (জন্মের কতক্ষণ পর শিশুকে বুকের দুধ খাওয়ানো হয়েছিল?)                                                                                                                                                                                      | [# hours]<br>[# minutes] (if more than 59 minutes, divide into hours and minutes)<br>(ঘন্টা/মিনিটে উল্লেখ করুন)                                                                                                                                                                                                                                                                                      | ____<br>hours/ঘন্টা<br><br>____<br>minutes/<br>মিনিট                                         |  |
| 501                                                                           | Did anyone help you put the baby to the breast after delivery? (বাচ্চাকে বুকের দুধ খাওয়ানো সময় কেউ আপনাকে সাহায্য করেছিল?)                                                                                                                                                                               | 1. Yes/হ্যাঁ<br>2. No/না                                                                                                                                                                                                                                                                                                                                                                             | ____                                                                                         |  |
| 502                                                                           | Who helped you put the baby to the breast after delivery?<br>(বাচ্চাকে বুকের দুধ খাওয়ানোর সময় কে আপনাকে সাহায্য করেছিল?)                                                                                                                                                                                 | 1. Hospital/Upazila Health Center, Clinic<br>/হাসপাতাল/উপজেলা স্বাস্থ্য কেন্দ্র/ক্লিনিক<br>2. Doctor /ডাক্তার<br>3. Midwife/nurse<br>/ধাত্রী/নার্স<br>4. Govt. Health Worker (FWA/HA)/সরকারী কর্মী<br>5. BRAC SS /ব্র্যাক স্বাস্থ্য সেবিকা<br>6. BRAC SK /ব্র্যাক স্বাস্থ্যকর্মী<br>7. PushtiKormi/পুষ্টিকর্মী<br>8. Others NGO Worker<br>/অন্যান্য-এনজিও কর্মী<br>9. TTBA /প্রশিক্ষণ প্রাপ্ত ধাত্রী | ____                                                                                         |  |

|     |                                                                                                                                       |                                                                                                                                                                                                                                                                                                                                                                                                                                                                                                                                                                                                                                            |   |  |
|-----|---------------------------------------------------------------------------------------------------------------------------------------|--------------------------------------------------------------------------------------------------------------------------------------------------------------------------------------------------------------------------------------------------------------------------------------------------------------------------------------------------------------------------------------------------------------------------------------------------------------------------------------------------------------------------------------------------------------------------------------------------------------------------------------------|---|--|
|     |                                                                                                                                       | 10. TBA/ধাত্রী<br>11. Village Doctor /গ্রাম্য ডাক্তার<br>12. Homeopath Doctor /হোমিওপ্যাথিক ডাক্তার<br>13. Kabiraj/herbal healer/কবিরাজ<br>14. Spiritual healer/সর্পিলা বৈদ্য<br>15. Husband /স্বামী<br>16. Mother/Mother-in-Law / মা/শাশুড়ী<br>17. Any other family member /পরিবারের অন্য কোন সদস্য<br>18. Relative/Friends /আত্মীয়/বন্ধু<br>19. Private clinic staff/বেসরকারী ক্লিনিকের স্টাফ<br>20. Community clinic staff/কমিউনিটি ক্লিনিকের স্টাফ<br>21. EPI center staff/টিকা কেন্দ্রের স্টাফ<br>22. Myself /নিজেই<br>23. Nobody/Never need advice /কেউ না/কখনো কেউ উপদেশ দেয়নি<br>24. Others (specify)/অন্যান্য (নির্দিষ্ট করুন) |   |  |
| 503 | Was the baby put to the breast before or after someone cleaned the baby? /শিশুকে কখন মায়ের বুকে লাগানো হয়েছিল (পরিষ্কারের আগে /পরে) | 1. Before someone cleaned the baby/শিশুকে পরিষ্কারের আগে<br>2. After someone cleaned the baby/শিশুকে পরিষ্কারের পরে<br>3. Don't know/remember/মনে নেই/জানা নেই                                                                                                                                                                                                                                                                                                                                                                                                                                                                             | — |  |
| 504 | Was the baby put to the breast before or after someone cleaned you? /                                                                 | 1. Before someone cleaned me/আপনাকে পরিষ্কারের আগে                                                                                                                                                                                                                                                                                                                                                                                                                                                                                                                                                                                         | — |  |

|     |                                                                                                                                                                                |                                                                                                                                                                                                                                                                                                                                                                                                                                                                                                                                                                                                                                                                                                                                                                                                             |     |  |
|-----|--------------------------------------------------------------------------------------------------------------------------------------------------------------------------------|-------------------------------------------------------------------------------------------------------------------------------------------------------------------------------------------------------------------------------------------------------------------------------------------------------------------------------------------------------------------------------------------------------------------------------------------------------------------------------------------------------------------------------------------------------------------------------------------------------------------------------------------------------------------------------------------------------------------------------------------------------------------------------------------------------------|-----|--|
|     | কখন শিশুকে আপনার বুকে<br>লাগিয়েছিল ( পরিক্ষারের আগে/পরে)                                                                                                                      | 2. After someone<br>cleaned me<br>(আপনাকে পরিক্ষারের পরে)<br>3. Don't<br>know/remember/মনে<br>নেই/জানি না                                                                                                                                                                                                                                                                                                                                                                                                                                                                                                                                                                                                                                                                                                   |     |  |
| 505 | Did you or anyone else<br>check to see if the baby<br>was suckling well? / আপনার<br>শিশু ঠিকমত বুকের দুধ টানতে পারছে<br>কিনা তা আপনি অথবা অন্য কেউ<br>দেখে নিশ্চিত হয়েছিল কি? | 1. Yes/হ্যাঁ<br>2. No/না                                                                                                                                                                                                                                                                                                                                                                                                                                                                                                                                                                                                                                                                                                                                                                                    | —   |  |
| 506 | Who checked if the baby<br>was suckling well? /আপনার<br>শিশু বুকের দুধ ঠিকমত টানতে পারছে<br>কিনা তা কে পরীক্ষা করেছিলেন?                                                       | 1. Hospital/Upazila<br>Health Center, Clinic<br>(হাসপাতাল/উপজেলা<br>স্বাস্থ্যকেন্দ্র/ক্লিনিক )<br>2. Doctor /ডাক্তার<br>3. Midwife/nurse<br>/ধাত্রী/নার্স<br>4. Govt. Heath Worker<br>(FWA/HA) /সরকারী<br>স্বাস্থ্যকর্মী( পরিবার কল্যান<br>সহকারী , স্বাস্থ্য সহকারী)<br>5. BRAC SS /ব্র্যাক স্বাস্থ্য<br>সেবিকা<br>6. BRAC SK /ব্র্যাক স্বাস্থ্যকর্মী<br>7. PushtiKormi/পুষ্টিকর্মী<br>8. Others NGO<br>Worker/অন্যান্য এনজিও<br>কর্মী<br>9. TTBA/প্রশিক্ষন প্রাপ্ত দাত্রী<br>10. TBA/ধাত্রী<br>11. Village Doctor /গ্রাম্য<br>ডাক্তার<br>12. Homeopath<br>Doctor/হেমিওপ্যাথিক<br>ডাক্তার<br>13. Kabiraj/herbal<br>healer /কবিরাজ<br>14. Spiritual healer/সর্পিলা<br>বৈদ্য<br>15. Husband/স্বামী<br>16. Mother/Mother-in-<br>Law /মা /শাশুড়ী<br>17. Any other family<br>member/পরিবারের অন্য<br>কোন সদস্য | — — |  |

|     |                                                                                                                                                                                                                                                                                  |                                                                                                                                                                                                                                                                                                                                                                                        |                                                       |                                                           |
|-----|----------------------------------------------------------------------------------------------------------------------------------------------------------------------------------------------------------------------------------------------------------------------------------|----------------------------------------------------------------------------------------------------------------------------------------------------------------------------------------------------------------------------------------------------------------------------------------------------------------------------------------------------------------------------------------|-------------------------------------------------------|-----------------------------------------------------------|
|     |                                                                                                                                                                                                                                                                                  | <p>18. Relative/Friends/<br/>আত্মীয়/বন্ধু</p> <p>19. Private clinic<br/>staff/বেসরকারী ক্লিনিকের<br/>স্টাফ</p> <p>20. Community clinic<br/>staff/কমিউনিটি ক্লিনিকের<br/>স্টাফ</p> <p>21. EPI center staff/টীকা<br/>কেন্দ্রের স্টাফ</p> <p>22. Myself/নিজেই</p> <p>23. Nobody/Never need<br/>advice /কেউ না /কখনোই<br/>না</p> <p>24. Others (specify)/<br/>অন্যান্য(নির্দিষ্ট করণ)</p> |                                                       |                                                           |
| 507 | <p>Did anyone put anything<br/>inside the baby's mouth<br/>IMMEDIATELY after the<br/>birth? (জন্মের সাথে সাথেই শিশুর<br/>মুখে অন্য কিছু দেওয়া হয়েছিল কি? )</p>                                                                                                                 | <p>1. Yes/হ্যাঁ</p> <p>2. No/না</p>                                                                                                                                                                                                                                                                                                                                                    | —                                                     | If 2 (No), go to<br>510 যদি না(২)হয়,<br>তবে ৫১০ যেতে হবে |
| 508 | <p>What was put in the<br/>baby's mouth<br/>IMMEDIATELY after<br/>birth?(জন্মের পর পর আপনার<br/>শিশুর মুখে কি দেওয়া হয়েছিল?)</p> <p>[Multiple responses<br/>allowed; do NOT read list<br/>to participant]<br/>(একাধিক উত্তর প্রযোজ্য: উত্তর দাতার<br/>কাছে উত্তর বলবেন না)</p> | <p>1. Honey/মধু</p> <p>2. Mustard oil /সরিষার তেল</p> <p>3. Plain water /পানি</p> <p>4. Sugar/glucose<br/>water/চিনি/গ্লুকোজ পানি</p> <p>5. Tea/coffee/ চা/ কফি</p> <p>6. Cow/goat milk<br/>/গরু/ছাগলের দুধ</p> <p>7. Breast milk /বুকের দুধ</p> <p>8. Other<br/>(specify)/অন্যান্য(নির্দিষ্ট<br/>করণ)</p> <p>99 Do not<br/>remember/মনে নেই</p>                                       | <p>—</p> <p>—</p> <p>—</p> <p>[Specify:<br/>_____</p> |                                                           |
| 509 | <p>Who put this in the baby's<br/>mouth immediately after<br/>birth?(জন্মের পর পরই বুকের দুধ<br/>খাওয়ানো সময় কে আপনাকে সাহায্য<br/>করেছিল?)</p>                                                                                                                                | <p>1. Hospital/Upazila<br/>Health Center, Clinic<br/>/হাসপাতাল/উপজেলা স্বাস্থ্য<br/>কেন্দ্র/ক্লিনিক</p> <p>2. Doctor /ডাক্তার</p> <p>3. Midwife/nurse/ধাত্রী/<br/>নার্স</p> <p>4. Govt. Heath Worker<br/>(FWA/HA) /সরকারী<br/>স্বাস্থ্যকর্মী</p> <p>5. BRAC SS /ব্র্যাক স্বাস্থ্য<br/>সেবিকা</p>                                                                                       | — —                                                   |                                                           |

|     |                                                                                                                                                                                                               |                                                                                                                                                                                                                                                                                                                                                                                                                                                                                                                                                                                                                                                                                                                                                                                              |                                   |  |
|-----|---------------------------------------------------------------------------------------------------------------------------------------------------------------------------------------------------------------|----------------------------------------------------------------------------------------------------------------------------------------------------------------------------------------------------------------------------------------------------------------------------------------------------------------------------------------------------------------------------------------------------------------------------------------------------------------------------------------------------------------------------------------------------------------------------------------------------------------------------------------------------------------------------------------------------------------------------------------------------------------------------------------------|-----------------------------------|--|
|     |                                                                                                                                                                                                               | 6. BRAC SK/ ব্র্যাক স্বাস্থ্যকর্মী<br>7. PushtiKormi/পুষ্টিকর্মী<br>8. Others NGO Worker /অন্যান্য এনজিও কর্মী<br>9. TTBA /প্রশিক্ষণ প্রাপ্তধাত্রী<br>10. TBA /ধাত্রী<br>11. Village Doctor /গ্রাম্য ডাক্তার<br>12. Homeopath Doctor /হোমিওপ্যাথিক ডাক্তার<br>13. Kabiraj/herbal healer/কবিরাজ<br>14. Spiritual healer/সপির্ল বৈদ্য<br>15. Husband/স্বামী<br>16. Mother/Mother-in-Law /মা/শাশুড়ী<br>17. Any other family member /পরিবারের অন্য কোন সদস্য<br>18. Relative/Friends /আত্মীয়/বন্ধু<br>19. Private clinic staff/বেসরকারী ক্লিনিকের স্টাফ<br>20. Community clinic staff/কমিউনিটি ক্লিনিকের স্টাফ<br>21. EPI center staff/টীকা কেন্দ্রের স্টাফ<br>22. Myself/নিজেই<br>23. Nobody/Never need advice/কেউ না/কখনো কেউ উপদেশ দেয়নি<br>24. Others (specify)/অন্যান্য (নির্দিষ্ট করুন) |                                   |  |
| 510 | During the first 3 days after the baby was born, what was given to the baby to drink or swallow by you or anyone else? [Multiple responses allowed]<br>(জন্মের তিন দিনের মধ্যে শিশুর মুখে কি দেওয়া হয়েছিল?) | 1. Honey/মধু<br>2. Mustard oil/সরিষার তেল<br>3. Plain water/ পানি<br>4. Sugar/glucose water /চিনি/গ্লুকোজ পানি<br>5. Tea/coffee/চা/কফি<br>6. Cow/goat milk (গরু/ছাগলের দুধ)<br>7. Breast milk /বুকের দুধ                                                                                                                                                                                                                                                                                                                                                                                                                                                                                                                                                                                     | —<br>—<br>—<br>[Specify:<br>_____ |  |

|     |                                                                                                                                                                                     |                                                                                                                                                                                                                                                                                                                                                                                                                   |                              |                                                       |
|-----|-------------------------------------------------------------------------------------------------------------------------------------------------------------------------------------|-------------------------------------------------------------------------------------------------------------------------------------------------------------------------------------------------------------------------------------------------------------------------------------------------------------------------------------------------------------------------------------------------------------------|------------------------------|-------------------------------------------------------|
|     | (একাধিক উত্তর প্রযোজ্য: উত্তর দাতার কাছে উত্তর বলবেন না)                                                                                                                            | 8. Other (specify)/অন্যান্য(নির্দিষ্ট করুন)<br>99 Do not remember /মনে নেই                                                                                                                                                                                                                                                                                                                                        |                              |                                                       |
| 511 | Did you give the baby colostrum? /আপনি শিশুকে শাল দুধ দিয়েছিলেন কি?                                                                                                                | ১. Yes/হ্যাঁ<br>2. No/না                                                                                                                                                                                                                                                                                                                                                                                          | —                            |                                                       |
| 512 | From birth until now, has this baby ever been given expressed breast milk (in a cup or bowl)?/জন্মের পর থেকে আজ পর্যন্ত শিশুকে কখনো বুকের দুধ গালিয়ে খাওয়ানো হয়েছে কি?(কাপ/বাটি) | 1. Yes/হ্যাঁ<br>2. No/না                                                                                                                                                                                                                                                                                                                                                                                          | —                            |                                                       |
| 513 | Is the baby still breast feeding (বাচ্চা কি এখনো বুকের দুধ খাচ্ছে?)                                                                                                                 | 1. Yes/হ্যাঁ<br>2. No/না                                                                                                                                                                                                                                                                                                                                                                                          | —                            | If 1 (Yes), go to 516/যদি হ্যাঁ হয় তবে ৫১৬ যেতে হবে. |
| 514 | If no, at what age did you stop breastfeeding? (যদি না হয় তাহলে কবে/কোন বয়সে বুকের দুধ খাওয়ানো বন্ধ করেছিলেন?)                                                                   | [response in months; if stopped before child one month of age, enter 0]                                                                                                                                                                                                                                                                                                                                           | —                            | Response in days (দিনে উল্লেখ করুন)                   |
| 515 | Why did you stop breastfeeding? [Multiple responses allowed] (কেন বুকের দুধ খাওয়া বন্ধ করেছিলেন?)                                                                                  | 1. Problems with breast (pain)বুকের সমস্যা(ব্যথা)<br>2. Child not suck well /শিশু ঠিকমত বুকের দুধ টানতে পারে না<br>3. Not enough time to feed child/শিশুকে খাওয়ানোর জন্য পর্যাপ্ত সময়ের অভাব<br>4. Mother got pregnant /মা পুনরায় গর্ভবতি হওয়া<br>5. Cracked nipples /বোটার সমস্যা/ঘা যুক্ত বোটা<br>6. Felt not enough breastmilk /বুকে পর্যাপ্ত দুধ না থাকা<br>7. Other (specify)/অন্যান্য ( নির্দিষ্ট করুন) | —<br>—<br>—<br>Specify:<br>— |                                                       |
| 516 | How many times did you breastfeed your baby yesterday, during the day and night? (গতকাল সারাদিনে ও রাতে আপনি কতবার বাচ্চাকে বুকের দুধ খাইয়েছিলেন?)                                 |                                                                                                                                                                                                                                                                                                                                                                                                                   | — —                          |                                                       |



|     |                                                                                                                                                                                                                                                                                                                                                                                                                                                                                                                                                                                                                                                   |                                                                                                                                                                                                                                              |                                                                                                                           |                                                                                                                          |
|-----|---------------------------------------------------------------------------------------------------------------------------------------------------------------------------------------------------------------------------------------------------------------------------------------------------------------------------------------------------------------------------------------------------------------------------------------------------------------------------------------------------------------------------------------------------------------------------------------------------------------------------------------------------|----------------------------------------------------------------------------------------------------------------------------------------------------------------------------------------------------------------------------------------------|---------------------------------------------------------------------------------------------------------------------------|--------------------------------------------------------------------------------------------------------------------------|
| 517 | Can you tell me what the baby was fed yesterday?<br>/গতকাল সারাদিনে বাচ্চাকে কি খাইয়েছিলেন?                                                                                                                                                                                                                                                                                                                                                                                                                                                                                                                                                      | <p>1. Breastmilk only/শুধুমাত্র বুকের দুধ</p> <p>2. Breastmilk plus water/বুকের দুধ আর পানি</p> <p>3. Breastmilk plus any other liquids or food/বুকের দুধ আর অন্য কোন তরল খাবার</p> <p>4. Other (specify):____/অন্যান্য (নির্দিষ্ট করুন)</p> | —                                                                                                                         |                                                                                                                          |
| 518 | <p>What was the baby fed yesterday besides breastmilk? /গতকাল শিশুকে বুকের দুধের পাশাপাশি আর কি খাওয়ানো হয়েছিল?</p> <p>a. Breast milk/বুকের দুধ</p> <p>b. Water/পানি</p> <p>c. Baby formula (prepared food for child)/প্রক্রিয়াজাত শিশুর খাদ্য</p> <p>d. Any other kind of milk (powder, cow/goat milk etc.)/অন্য কোন ধরনের দুধ(পাউডার/গরু/ছাগলের দুধ)</p> <p>e. Fruit juice (made at home) ফলের জুস(বাসায় তৈরী)</p> <p>f. Fruit juice (purchased, packaged) (ফলের জুস প্যাকেটজাত)</p> <p>g. Water-based /liquids, teas, sugar water, coffee/পানিযুক্ত তরল খাবার(চা/চিনির পানি/কফি)</p> <p>h. Other (specify): /অন্যান্য (নির্দিষ্ট করুন)</p> | <p>1=Yes (হ্যাঁ)</p> <p>2=No (না)</p>                                                                                                                                                                                                        | <p>a. —</p> <p>b. —</p> <p>c. —</p> <p>d. —</p> <p>e. —</p> <p>f. —</p> <p>g. —</p> <p>h. —</p> <p>Specify:<br/>_____</p> |                                                                                                                          |
| 519 | Do you feel you are having any problems breastfeeding? /আপনি কি শিশুকে বুকের দুধ খাওয়াতে কোন সমস্যা অনুভব করেন?                                                                                                                                                                                                                                                                                                                                                                                                                                                                                                                                  | <p>1. Yes/হ্যাঁ</p> <p>2. No/না</p>                                                                                                                                                                                                          | —                                                                                                                         | If 2 (No), go to 600 if recently-delivered from control area. Go to 700 if >60 days postpartum or living in intervention |

|                                                                                                                                                                |                                                                                                                                                  |                                                                                                                                                                                                                                                                                                                                                                                                                                                                                                                                                                                           |                                                                          |                                                                                                                                                                             |
|----------------------------------------------------------------------------------------------------------------------------------------------------------------|--------------------------------------------------------------------------------------------------------------------------------------------------|-------------------------------------------------------------------------------------------------------------------------------------------------------------------------------------------------------------------------------------------------------------------------------------------------------------------------------------------------------------------------------------------------------------------------------------------------------------------------------------------------------------------------------------------------------------------------------------------|--------------------------------------------------------------------------|-----------------------------------------------------------------------------------------------------------------------------------------------------------------------------|
|                                                                                                                                                                |                                                                                                                                                  |                                                                                                                                                                                                                                                                                                                                                                                                                                                                                                                                                                                           |                                                                          | area./যদি না হয়<br>তবে ৬০০ যেতে হবে                                                                                                                                        |
| 520                                                                                                                                                            | If yes, what problems do you currently face?<br>[Multiple answers allowed]/যদি হ্যাঁ হয় আপনি বর্তমানে বুকের দুধ খাওয়াতে কি সমস্যা অনুভব করছেন? | <ol style="list-style-type: none"> <li>1. Problems with breast (pain) /বুকের সমস্যা(ব্যথা)</li> <li>2. Baby not sucking/latching well /শিশু ঠিকমত বুকের দুধ টানতে পারে না</li> <li>3. Not able to breastfeed well /ঠিক মত খাওয়াতে না পারা</li> <li>4. Not enough time to feed baby /শিশুকে খাওয়ানোর জন্য পর্যাপ্ত সময়ের অভাব</li> <li>5. Cracked nipples /ঘাঁ যুক্ত বোটা</li> <li>6. Feel not enough breastmilk/বুকে পর্যাপ্ত দুধ না থাকা</li> <li>7. Poor appetite /শিশু খেতে অনিহা</li> <li>8. Baby sick/শিশুর অসুখ</li> <li>9. Other (specify)/অন্যান্য (নির্দিষ্ট করুন)</li> </ol> | <p>—</p> <p>—</p> <p>—</p> <p>—</p> <p>[Specify:<br/>/নির্দিষ্ট করুন</p> |                                                                                                                                                                             |
| 521                                                                                                                                                            | Did you seek help from anyone for this/these problems?/আপনি কি উপরে উল্লেখিত সমস্যা সমূহের জন্য কারো সাহায্য নিয়েছিলেন?                         | <ol style="list-style-type: none"> <li>1. Yes/হ্যাঁ</li> <li>2. No/না</li> </ol>                                                                                                                                                                                                                                                                                                                                                                                                                                                                                                          | —                                                                        | If no Go to 600 for control area.<br>যদি না হয় তবে ৬০০ যেতে হবে (কন্ট্রোল এলাকার জন্য)<br>Go to 700 living in both areas.<br>( উভয় এলাকার জন্য প্রশ্ন নাম্বার ৭০০ তে যান) |
| <b>Recently Delivered Women (Within 0-60 days of delivery) Control Areas only</b><br>সদ্য প্রসূতি মহিলা ( প্রসবের ০ থেকে ৬০ দিনের মধ্যে) কন্ট্রোল এরিয়ার জন্য |                                                                                                                                                  |                                                                                                                                                                                                                                                                                                                                                                                                                                                                                                                                                                                           |                                                                          |                                                                                                                                                                             |
| 600                                                                                                                                                            | Number IFA tablets reported consumed in the last month/শেষ মাসে কতটা আয়রণ ট্যাবলেট খেয়েছেন?                                                    | Enter 99 for don't know                                                                                                                                                                                                                                                                                                                                                                                                                                                                                                                                                                   | — —                                                                      |                                                                                                                                                                             |
| 601                                                                                                                                                            | Number calcium tablets reported consumed in the                                                                                                  | Enter 99 for don't know                                                                                                                                                                                                                                                                                                                                                                                                                                                                                                                                                                   | — —                                                                      |                                                                                                                                                                             |

|     |                                                                                                       |                                                                               |       |                                         |
|-----|-------------------------------------------------------------------------------------------------------|-------------------------------------------------------------------------------|-------|-----------------------------------------|
|     | last month (শেষ মাসে কতটা ক্যালসিয়াম ট্যাবলেট খেয়েছেন?)                                             |                                                                               |       |                                         |
| 602 | Fish/ Meat/Liver taken within last 24 hours (গত ২৪ ঘন্টায় মাছ/মাংস/কলিজি খেয়েছেন কি?)               | 1. Yes/হ্যাঁ<br>2. No/না                                                      | ___   | If no, skip to 604./না হলে ৬০৪ যেতে হবে |
| 603 | Amount (bowl) পরিমান                                                                                  | Enter stated number of bowl(s), or 99 for missing data/বোলে পরিমান লিখতে হবে  | _____ |                                         |
| 604 | Egg taken within 24 hours (গত ২৪ ঘন্টায় ডিম খেয়েছেন কি)                                             | 1. Yes/হ্যাঁ<br>2. No/না                                                      | ___   | If no, skip to 606./না হলে ৬০৬ যেতে হবে |
| 605 | Amount (bowl)/পরিমান                                                                                  | Enter stated number of bowl(s), or 99 for missing data/বোলে পরিমান লিখতে হবে/ | _____ |                                         |
| 606 | Milk /Milk Products taken within last 24 hours/গত ২৪ ঘন্টায় দুধ/ দুধের তৈরী খাবার খেয়েছেন কি?       | 1. Yes/হ্যাঁ<br>2. No/না                                                      | ___   | If no, skip to 608./না হলে ৬০৮ যেতে হবে |
| 607 | Amount (bowl)/পরিমান                                                                                  | Enter stated number of bowl(s), or 99 for missing data/পরিমান বোলে লিখতে হবে  | _____ |                                         |
| 608 | Orange/yellow vegetable/fruit taken within last 24 hours/গত ২৪ ঘন্টায় হলুদ/কমলা ফল/ শজি খেয়েছেন কি? | 1. Yes/হ্যাঁ<br>2. No/না                                                      | ___   | If no, skip to 610./না হলে ৬১০ যেতে হবে |
| 609 | Amount (bowl)/পরিমান                                                                                  | Enter stated number of bowl(s), or 99 for missing data/পরিমান বোলে লিখতে হবে  | _____ |                                         |
| 610 | Rice/ Bread taken within last 24 hours/গত ২৪ ঘন্টায় ভাত/রুটি খেয়েছেন কি?                            | 1. Yes/হ্যাঁ<br>2. No/না                                                      | ___   | If no, skip to 612./না হলে ৬১২ যেতে হবে |
| 611 | Amount (bowl)/পরিমান                                                                                  | Enter stated number of bowl(s), or 99 for missing data/পরিমান বোলে লিখতে হবে  | _____ |                                         |
| 612 | Dark Green Vegetables taken within last 24 hours/গত ২৪ ঘন্টায় গাঢ় সবুজ শাক খেয়েছেন কি?             | 1. Yes/হ্যাঁ<br>2. No/না                                                      | ___   | If no, skip to 614./না হলে ৬১৪ যেতে হবে |

বাংলাদেশ ম্যাটারনাল আউট কাম নিউটিশন ইনটারভেনশন সাক্ষাৎকার ফরম ভার্সন ১.০

এফএইচআই ৩৬০ গবেষণা #৯৪৯৭৫৭

পিএইচসি তে জমা দেবার তারিখঃ ২৭ অগাস্ট ২০১৬

পরিমার্জিত : ২৭ অগাস্ট ২০১৬

|     |                                                                             |                                                                              |     |                                         |
|-----|-----------------------------------------------------------------------------|------------------------------------------------------------------------------|-----|-----------------------------------------|
| 613 | Amount (bowl)/পরিমাণ                                                        | Enter stated number of bowl(s), or 99 for missing data/পরিমাণ বোলে লিখতে হবে | ___ | If no, skip to 616./না হলে ৬১৬ যেতে হবে |
| 614 | Thick Lentils taken within last 24 hours/গত ২৪ ঘন্টায় ঘন ডাল খেয়েছেন কিনা | 1. Yes/হ্যাঁ<br>2. No/না                                                     | ___ |                                         |
| 615 | Amount (bowl)/পরিমাণ                                                        | Enter stated number of bowl(s), or 99 for missing data/পরিমাণ বোলে লিখতে হবে | ___ |                                         |

**Current Functional Ability (বর্তমানে কার্যক্ষমতা)**

Please state whether you can currently do the following activities: (আপনি কি বর্তমানে নিম্নোক্ত কাজ সমূহ করতে পারেন?)

|     |                                                                                      |                          |     |  |
|-----|--------------------------------------------------------------------------------------|--------------------------|-----|--|
| 700 | Take care of the newborn baby? (আপনি কি সদ্য জন্মগ্রহণ কৃত বাচ্চার যত্ন নিতে পারেন?) | 1. Yes/হ্যাঁ<br>2. No/না | ___ |  |
| 701 | Feed the baby(বাচ্চাকে খাওয়াতে পারেন?)                                              | 1. Yes/হ্যাঁ<br>2. No/না | ___ |  |
| 702 | Wash the baby (শিশুকে পরিষ্কার করতে পারেন?)                                          | 1. Yes/হ্যাঁ<br>2. No/না | ___ |  |
| 703 | Wash the babies clothes?/শিশুর কাপড় পরিষ্কার করতে পারেন?                            | 1. Ye/হ্যাঁ<br>2. No/না  | ___ |  |
| 704 | Prepare meals?/খাবার তৈরী করতে পারেন?                                                | 1. Yes/হ্যাঁ<br>2. No/না | ___ |  |
| 705 | Clean the house? (বাড়ী পরিষ্কার করতে পারেন?)                                        | 1. Yes/হ্যাঁ<br>2. No/না | ___ |  |
| 706 | Get water? (পানি আনতে পারেন?)                                                        | 1. Yes/হ্যাঁ<br>2. No/না | ___ |  |
| 707 | Go to the facility? (স্বাস্থ্য কেন্দ্রে যেতে পারেন?)                                 | 1. Yes/হ্যাঁ<br>2. No/না | ___ |  |
| 708 | Take care of yourself (নিজের যত্ন নিতে পারেন?)                                       | 1. Yes/হ্যাঁ<br>2. No/না | ___ |  |
| 709 | Wash or bathe yourself (নিজে গোসল করতে পারেন?)                                       | 1. Yes/হ্যাঁ<br>2. No/না | ___ |  |
| 710 | Dress yourself (নিজে নিজে কাপড় পড়তে পারেন?)                                        | 1. Yes/হ্যাঁ<br>2. No/না | ___ |  |
| 711 | Wash your own clothes(নিজের কাপড় পরিষ্কার করতে পারেন?)                              | 1. Yes/হ্যাঁ<br>2. No/না | ___ |  |

If any of the above answers are 1 (Yes), go to the corresponding question/activity below:

বাংলাদেশ ম্যাটারনাল আউট কাম নিউটিশন ইনটারভেনশন সাক্ষাৎকার ফরম ভার্সন ১.০

এফএইচআই ৩৬০ গবেষণা #৯৪৯৭৫৭

পিএইচসি তে জমা দেবার তারিখঃ ২৭ অগাস্ট ২০১৬

পরিমার্জিত : ২৭ অগাস্ট ২০১৬

| যদি উপরে (৭০০-৭১১) এর উত্তর ১ হয় তাহলে উক্ত প্রশ্নের উত্তরের সাথে সামাজিক পূর্ণ নিচের উত্তর দিন |                                                                                                                                                                                                                                         |                                                           |                                                             |                                                                    |                                                               |
|--------------------------------------------------------------------------------------------------|-----------------------------------------------------------------------------------------------------------------------------------------------------------------------------------------------------------------------------------------|-----------------------------------------------------------|-------------------------------------------------------------|--------------------------------------------------------------------|---------------------------------------------------------------|
|                                                                                                  | Answer code: 1. Could do without difficulty (কোন সমস্যা ছাড়া কাজ করতে সক্ষম)<br>2. Could do with difficulty (কিঞ্চিৎ সমস্যা হলেও কাজ করতে সক্ষম)<br>3. Could not do at all /একেবারেই কাজ করতে অক্ষম<br>99. Not applicable/প্রযোজ্য নয় | A. Within 4-7 days of delivery<br>প্রসবের ৪-৭ দিনের মধ্যে | B. Within 8-14 days of delivery<br>প্রসবের ৮-১৪ দিনের মধ্যে | C. Within 2-4 weeks of delivery<br>প্রসবের ২ থেকে ৪ সপ্তাহের মধ্যে | D. Within 4-6 weeks of delivery<br>প্রসবের ৪-৬ সপ্তাহের মধ্যে |
| 712                                                                                              | Were you able to take care of the newborn baby?<br>আপনি কি সদ্য জন্মগ্রহণ কৃত শিশুর যত্ন নিতে পারেন?                                                                                                                                    | ক. _____                                                  | খ. _____                                                    | গ. _____                                                           | ঘ. _____                                                      |
| 713                                                                                              | Were you able to feed the baby/আপনি কি শিশু কে খাওয়াতে পারেন?                                                                                                                                                                          | ক. _____                                                  | খ. _____                                                    | গ. _____                                                           | ঘ. _____                                                      |
| 714                                                                                              | Were you able to wash the baby/আপনি কি শিশুকে গোসল করাতে সক্ষম?                                                                                                                                                                         | ক. _____                                                  | খ. _____                                                    | গ. _____                                                           | ঘ. _____                                                      |
| 715                                                                                              | Were you able to wash the babies clothes?/আপনি কি শিশুর কাপড় পরিষ্কার করতে সক্ষম?                                                                                                                                                      | ক. _____                                                  | খ. _____                                                    | গ. _____                                                           | ঘ. _____                                                      |
| 716                                                                                              | Were you able to prepare meals?/আপনি কি শিশুর খাবার তৈরী করতে সক্ষম?                                                                                                                                                                    | ক. _____                                                  | খ. _____                                                    | গ. _____                                                           | ঘ. _____                                                      |
| 717                                                                                              | Were you able to clean the house?/আপনি কি বাড়ী পরিষ্কার করতে সক্ষম?                                                                                                                                                                    | ক. _____                                                  | খ. _____                                                    | গ. _____                                                           | ঘ. _____                                                      |
| 718                                                                                              | Were you able to get water?/আপনি কি পানি আনতে সক্ষম?                                                                                                                                                                                    | ক. _____                                                  | খ. _____                                                    | গ. _____                                                           | ঘ. _____                                                      |
| 719                                                                                              | Were you able to go to the facility?আপনি স্বাস্থ্য কেন্দ্রে যেতে সক্ষম?                                                                                                                                                                 | ক. _____                                                  | খ. _____                                                    | গ. _____                                                           | ঘ. _____                                                      |
| 720                                                                                              | Were you able to care of herself./আপনি কি নিজের যত্ন নিজেই নিতে সক্ষম?                                                                                                                                                                  | ক. _____                                                  | খ. _____                                                    | গ. _____                                                           | ঘ. _____                                                      |
| 721                                                                                              | Were you able to wash or bathe herself/ আপনি কি নিজে গোসল করতে সক্ষম?                                                                                                                                                                   | ক. _____                                                  | খ. _____                                                    | গ. _____                                                           | ঘ. _____                                                      |
| 722                                                                                              | Were you able to get dressed./আপনি নিজে নিজে কাপড় পড়তে সক্ষম?                                                                                                                                                                         | ক. _____                                                  | খ. _____                                                    | গ. _____                                                           | ঘ. _____                                                      |

|                                          |                                                                                                                                                                                                                                     |                                                                                                                                                                                                                                                                                                                                                                  |                                  |          |                                                                                                                        |
|------------------------------------------|-------------------------------------------------------------------------------------------------------------------------------------------------------------------------------------------------------------------------------------|------------------------------------------------------------------------------------------------------------------------------------------------------------------------------------------------------------------------------------------------------------------------------------------------------------------------------------------------------------------|----------------------------------|----------|------------------------------------------------------------------------------------------------------------------------|
| 723                                      | Were you able to wash clothes<br>আপনি কি নিজের কাপড় পরিষ্কার করতে সক্ষম?                                                                                                                                                           | ক. _____                                                                                                                                                                                                                                                                                                                                                         | খ. _____                         | গ. _____ | ঘ. _____                                                                                                               |
| <b>Community-based Activity Exposure</b> |                                                                                                                                                                                                                                     |                                                                                                                                                                                                                                                                                                                                                                  |                                  |          |                                                                                                                        |
| 800                                      | Have you heard of any forums for husband's regarding maternal nutrition and health in your community?<br>আপনি কি আপনার এলাকায় স্বামীদের নিয়ে আয়োজিত গর্ভ কালীন পুষ্টি ও স্বাস্থ্য বিষয়ক সভা সম্পর্কে শুনেছেন?                   | 1. Yes/হ্যাঁ<br>2. No/না                                                                                                                                                                                                                                                                                                                                         | _____                            |          |                                                                                                                        |
| 801                                      | Has your husband attended any of these forums?<br>আপনার স্বামী ডশ এমন কোন সভায় অংশগ্রহণ করেছিলেন                                                                                                                                   | 1. Yes/হ্যাঁ<br>2. No/না                                                                                                                                                                                                                                                                                                                                         | _____                            |          | If 2 (No), thank the participant and end interview./<br>যদি না হয় তবে অংশগ্রহণকারীকে ধন্যবাদ দিয়ে ইন্টারভিউ শেষ করুন |
| 802                                      | Did your husband take any action after coming back from the forum?<br>আপনার স্বামী কি সভা থেকে আসার পর কোন ধরনের উদ্যোগ গ্রহণ করেছিলেন?                                                                                             | 1. Yes/হ্যাঁ<br>2. No/না                                                                                                                                                                                                                                                                                                                                         | _____                            |          |                                                                                                                        |
| 803                                      | If yes, what actions did he take?<br>যদি হ্যাঁ হয় তবে তিনি কি/কোন ধরনের উদ্যোগ গ্রহণ করেছিলেন?<br>[More than one response permitted, DO NOT read list to participant.]<br>(একাধিক উত্তর প্রযোজ্য: উত্তর দাতার কাছে উত্তর বলবেন না) | 1. Procure/ensure adequate food supply for you /পর্যাপ্ত খাবারের সরবরাহ নিশ্চিত করা/ব্যবস্থা করা<br>2. Reminds and encourages you to consume the recommended quantity of diversified foods daily/<br>প্রত্যেক দিন বিভিন্ন ধরনের খাবার খাওয়াতে উৎসাহিত করা<br>3. Helps you to ensure that there are enough tablets of IFA and Calcium at home/<br>বাসায় আয়রন ও | 1. _____<br>2. _____<br>3. _____ |          | Thank the participant and end interview./<br>অংশগ্রহণকারীকে ধন্যবাদ দিয়ে ইন্টারভিউ শেষ করুন।                          |

|  |  |                                                                                                                                                                                                                                                                                                                                                                                                                                                                                                                                                                                                                                                                                                                                                                           |                                                                                           |  |
|--|--|---------------------------------------------------------------------------------------------------------------------------------------------------------------------------------------------------------------------------------------------------------------------------------------------------------------------------------------------------------------------------------------------------------------------------------------------------------------------------------------------------------------------------------------------------------------------------------------------------------------------------------------------------------------------------------------------------------------------------------------------------------------------------|-------------------------------------------------------------------------------------------|--|
|  |  | <p>ক্যালসিয়াম ট্যাবলেটের পর্যাণ্ডতা নিশ্চিত করা</p> <p>4. Remind you to take one tablet of IFA daily daily/প্রত্যেক দিন একটা করে আয়রন ট্যাবলেট খেতে উৎসাহিত করা</p> <p>5. Remind you to take one tablet of Calcium daily/প্রত্যেক দিন একটা করে ক্যালসিয়াম ট্যাবলেট খেতে উৎসাহিত করা</p> <p>6. Remind /helps you to take rest for 2 hours/day /প্রত্যেক দিন ২ ঘন্টা কওে বিশ্রাম নিতে সাহায্য/মনে করিয়ে দেওয়া</p> <p>7. Did not let you lift heavy work load during pregnancy/গর্ভকালীন সময়ে ভারী কাজ করতে নিরল্ংসাহিত করা/করতে না দেওয়া</p> <p>8. Calls the health worker on mobile if you had any difficulties related to pregnancy /গর্ভকালীন সময়ে কোন জটিলতা হলে স্বাস্থ্য কর্মীকে ফোন করা</p> <p>9. Did not do anything differently /আলাদা করে কিছু করেনি।</p> | <p>4. ____</p> <p>5. ____</p> <p>6. ____</p> <p>7. ____</p> <p>8. ____</p> <p>9. ____</p> |  |
|--|--|---------------------------------------------------------------------------------------------------------------------------------------------------------------------------------------------------------------------------------------------------------------------------------------------------------------------------------------------------------------------------------------------------------------------------------------------------------------------------------------------------------------------------------------------------------------------------------------------------------------------------------------------------------------------------------------------------------------------------------------------------------------------------|-------------------------------------------------------------------------------------------|--|
